# Supplementary material for: Remote C−H functionalization using radical translocating arylating groups
Source: PubMed Central journal article supplement (PMC6051993; doi:10.1038/s41467-018-05193-6), 2018-07-18
Supplement: 41467_2018_5193_MOESM2_ESM.pdf [file 41467_2018_5193_MOESM2_ESM.pdf]

## Cartesian coordinates of all DFT-optimized structures

### 2n-PhRad

E(PBE0-D3/def2-TZVP) = -1285.872683203 (conv)

Lowest Freq. = 17.45 cm<sup>-1</sup>

46

2n-PhRad (001/c1/pbe0-d3.def2-TZVP)

|   |            |            |            |
|---|------------|------------|------------|
| C | -2.8062755 | -1.1065998 | 0.7114825  |
| C | -3.2617673 | 0.0268660  | -0.1958273 |
| C | -1.3157466 | -1.0231886 | 1.0006801  |
| H | -3.0242119 | -2.0652919 | 0.2237361  |
| H | -3.3714960 | -1.1002219 | 1.6480881  |
| C | -0.4853008 | -0.9687417 | -0.2798984 |
| H | -1.1064082 | -0.1273542 | 1.5983665  |
| H | -0.9988113 | -1.8780778 | 1.6069215  |
| C | -2.4413188 | 0.0600054  | -1.4766511 |
| H | -3.1400666 | 0.9819893  | 0.3303225  |
| H | -4.3266998 | -0.0734413 | -0.4248151 |
| C | -0.9548112 | 0.1765389  | -1.1737472 |
| H | -0.6862283 | -1.8961167 | -0.8286014 |
| C | 1.0180242  | -0.9516696 | 0.0378011  |
| H | -0.3739945 | 0.1998029  | -2.0988158 |
| H | -0.7709388 | 1.1300506  | -0.6708685 |
| H | -2.6292317 | -0.8558757 | -2.0512102 |
| H | -2.7568363 | 0.8944947  | -2.1094828 |
| H | 1.1673259  | -1.1531332 | 1.1013642  |
| O | 1.5610888  | 0.3746054  | -0.2131143 |
| C | 1.8831896  | -1.9557341 | -0.7418075 |
| C | 1.4571469  | -3.3657560 | -0.3353539 |
| C | 3.3470999  | -1.7650668 | -0.3494800 |
| C | 1.7334652  | -1.7739473 | -2.2483008 |
| H | 1.5574841  | -3.5114884 | 0.7437572  |
| H | 2.0967875  | -4.0996293 | -0.8307295 |
| H | 0.4254408  | -3.5893726 | -0.6140582 |
| H | 0.7105050  | -1.9623539 | -2.5829313 |
| H | 2.3865006  | -2.4743150 | -2.7747162 |
| H | 2.0145328  | -0.7627181 | -2.5490061 |
| H | 3.4777538  | -1.8310497 | 0.7337123  |
| H | 3.7280048  | -0.7966271 | -0.6759256 |
| H | 3.9593836  | -2.5418036 | -0.8136213 |
| S | 2.1030296  | 1.3003443  | 0.9378453  |
| O | 3.1601305  | 2.0517671  | 0.3488252  |
| O | 2.3030457  | 0.5338510  | 2.1252614  |
| C | 0.7513537  | 2.4004065  | 1.2013081  |
| C | 0.6039445  | 3.5397670  | 0.4107429  |
| C | -0.4930299 | 4.3626714  | 0.6083981  |
| H | 1.3542437  | 3.7629044  | -0.3387563 |
| C | -1.4378261 | 4.0678894  | 1.5845365  |
| H | -0.6111853 | 5.2489796  | -0.0028760 |
| C | -1.2961268 | 2.9375652  | 2.3891586  |
| H | -2.2901915 | 4.7225941  | 1.7287557  |
| C | -0.1997557 | 2.1571513  | 2.1512490  |
| H | -2.0212221 | 2.6993297  | 3.1582819  |

### 2n-TS1Aa

E(PBE0-D3/def2-TZVP) = -1285.864402242 (conv)

Lowest Freq. = -890.49 cm<sup>-1</sup>

46

2n-TS1Aa (TS001A/c1/pbe0-d3.def2-TZVP)

|   |            |            |            |
|---|------------|------------|------------|
| C | -2.8535289 | -1.3909160 | 0.6523276  |
| C | -3.3149253 | -0.1465925 | -0.0913822 |

|   |            |            |            |
|---|------------|------------|------------|
| C | -1.3697791 | -1.3239001 | 0.9774704  |
| H | -3.0482886 | -2.2754865 | 0.0324453  |
| H | -3.4329285 | -1.5210184 | 1.5704653  |
| C | -0.5243162 | -1.1146260 | -0.2785603 |
| H | -1.1760360 | -0.5043773 | 1.6785368  |
| H | -1.0493525 | -2.2409943 | 1.4811196  |
| C | -2.4811912 | 0.0836221  | -1.3447201 |
| H | -3.2164669 | 0.7211356  | 0.5711194  |
| H | -4.3739876 | -0.2257782 | -0.3518216 |
| C | -1.0028857 | 0.1042288  | -1.0380167 |
| H | -0.7032903 | -1.9793764 | -0.9326296 |
| C | 0.9752232  | -1.0983522 | 0.0505181  |
| H | -0.3872083 | 0.3401009  | -1.9067810 |
| H | -0.8127452 | 1.0661033  | -0.3020623 |
| H | -2.6839393 | -0.7210251 | -2.0663218 |
| H | -2.7737094 | 1.0145789  | -1.8396757 |
| H | 1.1151147  | -1.4686997 | 1.0682146  |
| O | 1.4660472  | 0.2697288  | 0.0304378  |
| C | 1.8899583  | -1.9204868 | -0.8695482 |
| C | 1.5176232  | -3.3949550 | -0.7208743 |
| C | 3.3357830  | -1.7409918 | -0.4106826 |
| C | 1.7595138  | -1.4921517 | -2.3271202 |
| H | 1.5896627  | -3.7171379 | 0.3216143  |
| H | 2.2061407  | -4.0080904 | -1.3066156 |
| H | 0.5070127  | -3.6105859 | -1.0739157 |
| H | 0.7505604  | -1.6598802 | -2.7120362 |
| H | 2.4482557  | -2.0697249 | -2.9483613 |
| H | 2.0053034  | -0.4352630 | -2.4481304 |
| H | 3.4497965  | -2.0114503 | 0.6428747  |
| H | 3.6714470  | -0.7106562 | -0.5299870 |
| H | 3.9950244  | -2.3857412 | -0.9965249 |
| S | 1.7615563  | 1.0703066  | 1.3533730  |
| O | 3.0830093  | 1.5982119  | 1.2590145  |
| O | 1.3993193  | 0.2695330  | 2.4836485  |
| C | 0.6268949  | 2.4098285  | 1.1943110  |
| C | 0.9436889  | 3.6164416  | 1.8127850  |
| C | 0.0349673  | 4.6602709  | 1.7546487  |
| H | 1.8949703  | 3.7275182  | 2.3198062  |
| C | -1.1701236 | 4.5087954  | 1.0805640  |
| H | 0.2728794  | 5.6028446  | 2.2326090  |
| C | -1.4757987 | 3.3058692  | 0.4517386  |
| H | -1.8722467 | 5.3340342  | 1.0359024  |
| C | -0.5680245 | 2.2749507  | 0.5294389  |
| H | -2.4089801 | 3.1901546  | -0.0892159 |

## 2n-TS1Ab

E(PBE0-D3/def2-TZVP) = -1285.861154006 (conv)

Lowest Freq. = -963.80 cm<sup>-1</sup>

46

2n-TS1Ab (TS001A/c2/pbe0-d3.def2-TZVP)

|   |            |            |            |
|---|------------|------------|------------|
| C | -2.8130515 | -1.8721880 | -1.1013840 |
| C | -3.5321642 | -1.2291914 | 0.0707692  |
| C | -1.3284487 | -2.0689881 | -0.8248611 |
| H | -2.9299844 | -1.2373399 | -1.9883681 |
| H | -3.2670282 | -2.8362691 | -1.3476724 |
| C | -0.6301604 | -0.7506987 | -0.4694389 |
| H | -1.2018729 | -2.7820081 | -0.0015596 |
| H | -0.8665946 | -2.5145736 | -1.7055303 |
| C | -2.8580117 | 0.0867217  | 0.4372188  |
| H | -3.5018970 | -1.9048351 | 0.9336542  |

|   |            |            |            |
|---|------------|------------|------------|
| H | -4.5874172 | -1.0644980 | -0.1655076 |
| C | -1.3837258 | -0.1169860 | 0.6883350  |
| H | -0.7102777 | -0.0878659 | -1.3407678 |
| C | 0.8605160  | -0.8680493 | -0.1307518 |
| H | -0.9429085 | 1.0017676  | 0.9287981  |
| H | -1.1965897 | -0.6569345 | 1.6226269  |
| H | -2.9903823 | 0.7980456  | -0.3875472 |
| H | -3.3301007 | 0.5294576  | 1.3188439  |
| H | 0.9730086  | -1.2879340 | 0.8727741  |
| O | 1.3272179  | 0.5135890  | -0.0763851 |
| C | 1.8127319  | -1.6295061 | -1.0786394 |
| C | 1.6706751  | -3.1401316 | -0.8749020 |
| C | 3.2559285  | -1.2807198 | -0.7054670 |
| C | 1.5778582  | -1.2447910 | -2.5358373 |
| H | 1.8395255  | -3.4052041 | 0.1724419  |
| H | 2.4310184  | -3.6527992 | -1.4687917 |
| H | 0.7034610  | -3.5381470 | -1.1715083 |
| H | 0.5896921  | -1.5411317 | -2.8930064 |
| H | 2.3190717  | -1.7315553 | -3.1742439 |
| H | 1.6799034  | -0.1655677 | -2.6704103 |
| H | 3.4477855  | -1.4681576 | 0.3547290  |
| H | 3.4952285  | -0.2384866 | -0.9098731 |
| H | 3.9381950  | -1.9078728 | -1.2837725 |
| S | 1.9277272  | 1.1636237  | 1.2291857  |
| O | 3.2325265  | 1.6578537  | 0.9313272  |
| O | 1.7417224  | 0.2627918  | 2.3263433  |
| C | 0.8507277  | 2.5453707  | 1.3983951  |
| C | 1.3702051  | 3.8015759  | 1.6847435  |
| C | 0.4916589  | 4.8617626  | 1.8547795  |
| H | 2.4426864  | 3.9346256  | 1.7596947  |
| C | -0.8778360 | 4.6701950  | 1.7325829  |
| H | 0.8811537  | 5.8476411  | 2.0780951  |
| C | -1.3914309 | 3.4086161  | 1.4367455  |
| H | -1.5535270 | 5.5084628  | 1.8628600  |
| C | -0.5061442 | 2.3709031  | 1.2786898  |
| H | -2.4606713 | 3.2594264  | 1.3325922  |

## 2n-TS1Ba

E(PBE0-D3/def2-TZVP) = -1285.856355867 (conv)

Lowest Freq. = -979.97 cm<sup>-1</sup>

46

2n-TS1Ba (TS001B/c1/pbe0-d3.def2-TZVP)

|   |            |            |            |
|---|------------|------------|------------|
| C | -2.4312743 | 0.1879947  | -1.3213115 |
| C | -3.0691296 | -1.1081410 | -1.8081286 |
| C | -0.9299968 | 0.0632200  | -1.1854400 |
| H | -2.8544620 | 0.4416947  | -0.3415555 |
| H | -2.6796801 | 1.0131600  | -1.9948838 |
| C | -0.5135649 | -1.1115686 | -0.3198364 |
| H | -0.4148334 | 0.1083484  | -2.1461876 |
| H | -0.5851770 | 1.0821560  | -0.6006033 |
| C | -2.6722709 | -2.2657293 | -0.9070843 |
| H | -2.7389116 | -1.3171677 | -2.8328695 |
| H | -4.1570226 | -1.0000484 | -1.8437334 |
| C | -1.1589298 | -2.4007627 | -0.8339312 |
| H | -0.9587771 | -0.9257690 | 0.6669398  |
| C | 0.9923333  | -1.2192587 | -0.0227499 |
| H | -0.8827737 | -3.2398285 | -0.1889735 |
| H | -0.7861481 | -2.6295307 | -1.8368298 |
| H | -3.0735086 | -2.0994942 | 0.0997804  |
| H | -3.1098862 | -3.2000460 | -1.2698924 |

|   |            |            |            |
|---|------------|------------|------------|
| H | 1.0962734  | -1.7913258 | 0.9033841  |
| O | 1.4713337  | 0.1304333  | 0.2467791  |
| C | 2.0084234  | -1.8166551 | -1.0212570 |
| C | 1.8496247  | -3.3367184 | -1.0975970 |
| C | 3.4139169  | -1.5489236 | -0.4726739 |
| C | 1.8978167  | -1.2091642 | -2.4153808 |
| H | 1.8750514  | -3.7865810 | -0.1013391 |
| H | 2.6849351  | -3.7520973 | -1.6661315 |
| H | 0.9326172  | -3.6516347 | -1.5901698 |
| H | 0.9567343  | -1.4726057 | -2.9025884 |
| H | 2.7094721  | -1.5819761 | -3.0451956 |
| H | 1.9779263  | -0.1208569 | -2.3782410 |
| H | 3.5124012  | -1.9118419 | 0.5541937  |
| H | 3.6597437  | -0.4882613 | -0.4749512 |
| H | 4.1480155  | -2.0756174 | -1.0866187 |
| S | 1.3777423  | 0.7753827  | 1.6771784  |
| O | 2.6916665  | 1.1254240  | 2.1084143  |
| O | 0.5635529  | -0.0536686 | 2.5146581  |
| C | 0.5184665  | 2.2587777  | 1.2724630  |
| C | 0.7424915  | 3.3958967  | 2.0425099  |
| C | 0.0270504  | 4.5482493  | 1.7593594  |
| H | 1.4762693  | 3.3701493  | 2.8395277  |
| C | -0.8915367 | 4.5696640  | 0.7176741  |
| H | 0.1933086  | 5.4396156  | 2.3520868  |
| C | -1.1035338 | 3.4325281  | -0.0568446 |
| H | -1.4419585 | 5.4787388  | 0.5015256  |
| C | -0.3898713 | 2.2960560  | 0.2421939  |
| H | -1.8127794 | 3.4494680  | -0.8773410 |

## 2n-TS1Bb

E(PBE0-D3/def2-TZVP) = -1285.865358672 (conv)

Lowest Freq. = -1023.10 cm<sup>-1</sup>

46

2n-TS1Bb (TS001B/c2/pbe0-d3.def2-TZVP)

|   |            |            |            |
|---|------------|------------|------------|
| C | -2.9175727 | -0.6121965 | 0.3842856  |
| C | -3.1931765 | 0.3460520  | -0.7664300 |
| C | -1.4461422 | -0.7089342 | 0.7062250  |
| H | -3.2788446 | -1.6139991 | 0.1102328  |
| H | -3.4808214 | -0.3224561 | 1.2766220  |
| C | -0.5559515 | -0.9903916 | -0.4904247 |
| H | -1.1000274 | 0.3926082  | 1.1538051  |
| H | -1.2397282 | -1.3777525 | 1.5456200  |
| C | -2.3199303 | 0.0243870  | -1.9686385 |
| H | -2.9837835 | 1.3719427  | -0.4440490 |
| H | -4.2518837 | 0.3114318  | -1.0380578 |
| C | -0.8435911 | 0.0235146  | -1.5975201 |
| H | -0.8377534 | -1.9846459 | -0.8658291 |
| C | 0.9056262  | -1.0896958 | -0.0518585 |
| H | -0.2365837 | -0.1802811 | -2.4788083 |
| H | -0.5565085 | 1.0192747  | -1.2466482 |
| H | -2.5967311 | -0.9591460 | -2.3693909 |
| H | -2.4998587 | 0.7474574  | -2.7690209 |
| H | 0.9258476  | -1.4872688 | 0.9657922  |
| O | 1.4497203  | 0.2550985  | 0.0133486  |
| C | 1.8718396  | -1.9657149 | -0.8689995 |
| C | 1.3829701  | -3.4115678 | -0.7968406 |
| C | 3.2493224  | -1.8906237 | -0.2088651 |
| C | 1.9973164  | -1.5361904 | -2.3267164 |
| H | 1.2565253  | -3.7378455 | 0.2393794  |
| H | 2.1174709  | -4.0710587 | -1.2644890 |

|   |            |            |            |
|---|------------|------------|------------|
| H | 0.4353276  | -3.5564926 | -1.3197049 |
| H | 1.0848437  | -1.7362717 | -2.8916381 |
| H | 2.8053858  | -2.0957246 | -2.8045953 |
| H | 2.2337736  | -0.4733925 | -2.4068503 |
| H | 3.1965703  | -2.1514186 | 0.8512225  |
| H | 3.6787549  | -0.8909921 | -0.2877510 |
| H | 3.9312567  | -2.5898802 | -0.6980680 |
| S | 1.8750326  | 0.9180009  | 1.3802883  |
| O | 3.0967259  | 1.6100785  | 1.1346019  |
| O | 1.7931486  | -0.0588300 | 2.4225075  |
| C | 0.6059068  | 2.1176544  | 1.6228133  |
| C | 0.9626566  | 3.4317050  | 1.9029901  |
| C | -0.0354905 | 4.3577297  | 2.1674161  |
| H | 2.0097189  | 3.7090502  | 1.9082536  |
| C | -1.3697852 | 3.9777768  | 2.1488567  |
| H | 0.2324291  | 5.3839465  | 2.3878360  |
| C | -1.7225291 | 2.6627279  | 1.8539105  |
| H | -2.1435908 | 4.7082555  | 2.3578769  |
| C | -0.7218017 | 1.7558374  | 1.5999445  |
| H | -2.7660841 | 2.3682413  | 1.8273658  |

## 2n-INT1A

E(PBE0-D3/def2-TZVP) = -1285.898863725 (conv)

Lowest Freq. = 9.46 cm<sup>-1</sup>

46

2n-INT1A (002A/c1/pbe0-d3.def2-TZVP)

|   |            |            |            |
|---|------------|------------|------------|
| C | -2.8047467 | -0.8411262 | 0.6077526  |
| C | -3.1160794 | 0.3302562  | -0.3097525 |
| C | -1.3211506 | -0.9018903 | 0.9296387  |
| H | -3.1131357 | -1.7768531 | 0.1234230  |
| H | -3.3833517 | -0.7636128 | 1.5327544  |
| C | -0.4659387 | -1.0126377 | -0.3398678 |
| H | -1.0358326 | 0.0015682  | 1.4763283  |
| C | -2.3095411 | 0.2358855  | -1.6041682 |
| H | -2.8607149 | 1.2637811  | 0.2032689  |
| H | -4.1852642 | 0.3688426  | -0.5368286 |
| C | -0.8666528 | 0.0079707  | -1.3453204 |
| H | -0.6989598 | -2.0040783 | -0.7644434 |
| C | 1.0334766  | -1.0201686 | -0.0070726 |
| H | -0.1262109 | 0.4172817  | -2.0187099 |
| H | -2.7187820 | -0.5991809 | -2.2012016 |
| H | -2.4500026 | 1.1332876  | -2.2128042 |
| H | 1.1644401  | -1.2227267 | 1.0592379  |
| O | 1.5943061  | 0.2942639  | -0.2601056 |
| C | 1.8946849  | -2.0383368 | -0.7731605 |
| C | 1.4599003  | -3.4433837 | -0.3589180 |
| C | 3.3570369  | -1.8521621 | -0.3723710 |
| C | 1.7541250  | -1.8693142 | -2.2819364 |
| H | 1.5391363  | -3.5779868 | 0.7234454  |
| H | 2.1085531  | -4.1827234 | -0.8340267 |
| H | 0.4339521  | -3.6706138 | -0.6558875 |
| H | 0.7280944  | -2.0369210 | -2.6176094 |
| H | 2.3950568  | -2.5883827 | -2.7979940 |
| H | 2.0576495  | -0.8676412 | -2.5927575 |
| H | 3.4803076  | -1.9108797 | 0.7121221  |
| H | 3.7436666  | -0.8873902 | -0.7020850 |
| H | 3.9681360  | -2.6351406 | -0.8274583 |
| S | 2.0404295  | 1.2638139  | 0.8977697  |
| O | 3.0192862  | 2.1076898  | 0.2987705  |
| O | 2.3358257  | 0.5086555  | 2.0761410  |

|   |            |            |            |
|---|------------|------------|------------|
| C | 0.5909071  | 2.2160668  | 1.1997933  |
| C | 0.0433349  | 2.9604752  | 0.1630107  |
| C | -1.0990226 | 3.7040470  | 0.3997951  |
| H | 0.5122572  | 2.9540174  | -0.8127036 |
| C | -1.6806990 | 3.7051541  | 1.6618082  |
| H | -1.5384666 | 4.2850447  | -0.4020960 |
| C | -1.1196500 | 2.9655835  | 2.6915350  |
| H | -2.5758555 | 4.2889197  | 1.8418336  |
| C | 0.0233199  | 2.2129256  | 2.4635976  |
| H | -1.5712380 | 2.9719779  | 3.6762410  |
| H | 0.4772354  | 1.6216007  | 3.2485433  |
| H | -1.1024040 | -1.7524197 | 1.5832212  |

## 2n-INT1B

E(PBE0-D3/def2-TZVP) = -1285.899203295 (conv)

Lowest Freq. = 18.52 cm<sup>-1</sup>

46

2n-INT1B (002B/c1/pbe0-d3.def2-TZVP)

|   |            |            |            |
|---|------------|------------|------------|
| C | -2.7209415 | -0.5852996 | 0.8551333  |
| C | -3.0823950 | 0.4070512  | -0.2464058 |
| C | -1.2631980 | -0.8485138 | 0.9208777  |
| H | -3.2550932 | -1.5320298 | 0.6556340  |
| H | -3.0892011 | -0.2390089 | 1.8254921  |
| C | -0.4665479 | -1.0161540 | -0.3275212 |
| H | -0.8338925 | -1.2011766 | 1.8534548  |
| C | -2.4013791 | 0.0356235  | -1.5531891 |
| H | -2.7549078 | 1.4086094  | 0.0524295  |
| H | -4.1680813 | 0.4473937  | -0.3712096 |
| C | -0.8900664 | 0.0087716  | -1.3870629 |
| H | -0.7135921 | -2.0073622 | -0.7478674 |
| C | 1.0382919  | -1.0421562 | -0.0212227 |
| H | -0.4020606 | -0.2077874 | -2.3384711 |
| H | -0.5538336 | 1.0011886  | -1.0798877 |
| H | -2.7581695 | -0.9464735 | -1.8897055 |
| H | -2.6716156 | 0.7500262  | -2.3360496 |
| H | 1.1771894  | -1.3025420 | 1.0307408  |
| O | 1.5911232  | 0.2868026  | -0.1985483 |
| C | 1.9092206  | -2.0194040 | -0.8291804 |
| C | 1.4921745  | -3.4427451 | -0.4615611 |
| C | 3.3676962  | -1.8255647 | -0.4156042 |
| C | 1.7790150  | -1.8137287 | -2.3338497 |
| H | 1.5774414  | -3.6139136 | 0.6150323  |
| H | 2.1459452  | -4.1582966 | -0.9652238 |
| H | 0.4669690  | -3.6692692 | -0.7617628 |
| H | 0.7716033  | -2.0418223 | -2.6893026 |
| H | 2.4702046  | -2.4778495 | -2.8588027 |
| H | 2.0230493  | -0.7869585 | -2.6135979 |
| H | 3.4859697  | -1.9121201 | 0.6677544  |
| H | 3.7433442  | -0.8472337 | -0.7166628 |
| H | 3.9907183  | -2.5888847 | -0.8875339 |
| S | 1.9857493  | 1.2015177  | 1.0254655  |
| O | 3.0378530  | 2.0273253  | 0.5351186  |
| O | 2.1606962  | 0.3904887  | 2.1905570  |
| C | 0.5563876  | 2.2030924  | 1.2512483  |
| C | 0.3111167  | 3.2358305  | 0.3559860  |
| C | -0.8269974 | 4.0079610  | 0.5146987  |
| H | 1.0127936  | 3.4288744  | -0.4459732 |
| C | -1.6994951 | 3.7533802  | 1.5652534  |
| H | -1.0300335 | 4.8158370  | -0.1779144 |
| C | -1.4358953 | 2.7287377  | 2.4618276  |

|   |            |           |           |
|---|------------|-----------|-----------|
| H | -2.5869109 | 4.3632015 | 1.6884575 |
| C | -0.3043261 | 1.9427104 | 2.3060503 |
| H | -2.1126817 | 2.5389138 | 3.2862523 |
| H | -0.0732373 | 1.1429572 | 2.9966465 |

### 2n-TS2Aa

E(PBE0-D3/def2-TZVP) = -1285.880926802 (conv)

Lowest Freq. = -399.40 cm<sup>-1</sup>

46

2n-TS2Aa (TS002A/c1/pbe0-d3.def2-TZVP)

|   |            |            |            |
|---|------------|------------|------------|
| C | -2.4886598 | -1.4129151 | -1.1540211 |
| C | -3.2125406 | -1.5214591 | 0.1781524  |
| C | -1.0149108 | -1.7429987 | -0.9904567 |
| H | -2.5920176 | -0.3942655 | -1.5503800 |
| H | -2.9465615 | -2.0807712 | -1.8886679 |
| C | -0.3547418 | -0.8041619 | 0.0155683  |
| H | -0.8915572 | -2.7760974 | -0.6522411 |
| C | -2.5766565 | -0.6354011 | 1.2423992  |
| H | -3.1866496 | -2.5622675 | 0.5109549  |
| H | -4.2676525 | -1.2566803 | 0.0677027  |
| C | -1.0875908 | -0.7413657 | 1.3206203  |
| H | -0.4619981 | 0.2118829  | -0.3999881 |
| C | 1.1526268  | -1.0705544 | 0.1692766  |
| H | -0.6350889 | -0.0581886 | 2.0339012  |
| H | -2.8161999 | 0.4160281  | 1.0146471  |
| H | -3.0151749 | -0.8292581 | 2.2253363  |
| H | 1.4252905  | -1.9220772 | -0.4595835 |
| O | 1.4806089  | -1.4401898 | 1.5287413  |
| C | 2.0796381  | 0.0979641  | -0.1888612 |
| C | 1.8762953  | 0.4374579  | -1.6637302 |
| C | 3.5280793  | -0.3427532 | 0.0137272  |
| C | 1.7936584  | 1.3204775  | 0.6779010  |
| H | 2.0761042  | -0.4294023 | -2.2994551 |
| H | 2.5669118  | 1.2314186  | -1.9565097 |
| H | 0.8641289  | 0.7886815  | -1.8768823 |
| H | 0.7778413  | 1.6973791  | 0.5339984  |
| H | 2.4815630  | 2.1290388  | 0.4199786  |
| H | 1.9282835  | 1.0892163  | 1.7360760  |
| H | 3.7511752  | -1.2354198 | -0.5770524 |
| H | 3.7329758  | -0.5712031 | 1.0596427  |
| H | 4.2083576  | 0.4506062  | -0.3049152 |
| S | 0.9217023  | -2.8069185 | 2.0866664  |
| O | 1.7514573  | -3.1063420 | 3.2048134  |
| O | 0.7911499  | -3.7332463 | 1.0031238  |
| C | -0.7063256 | -2.4086536 | 2.6825622  |
| C | -0.7679027 | -1.6896359 | 3.9127934  |
| C | -1.8745548 | -1.7912445 | 4.7162755  |
| H | 0.0592091  | -1.0470441 | 4.1890759  |
| C | -2.9086214 | -2.6790447 | 4.4004485  |
| H | -1.9280784 | -1.2023296 | 5.6246255  |
| C | -2.7936195 | -3.4904771 | 3.2749718  |
| H | -3.7701633 | -2.7649878 | 5.0507157  |
| C | -1.6954934 | -3.3984124 | 2.4477032  |
| H | -3.5608460 | -4.2245955 | 3.0571938  |
| H | -1.5724395 | -4.0658054 | 1.6050765  |
| H | -0.4935275 | -1.6617280 | -1.9490666 |

### 2n-TS2Ab

E(PBE0-D3/def2-TZVP) = -1285.883272554 (conv)

Lowest Freq. = -333.80 cm<sup>-1</sup>

46

2n-TS2Ab (TS002A/c2/pbe0-d3.def2-TZVP)

|   |            |            |            |
|---|------------|------------|------------|
| C | -1.1969965 | 2.1848682  | -0.1548428 |
| C | -2.5178950 | 1.4388571  | -0.0985026 |
| C | -0.0588578 | 1.3001095  | -0.6443364 |
| H | -0.9522308 | 2.5583927  | 0.8471707  |
| H | -1.2786998 | 3.0624566  | -0.8023470 |
| C | 0.0893939  | 0.0340563  | 0.2177545  |
| H | -0.2348561 | 1.0125299  | -1.6871773 |
| C | -2.3774524 | 0.1867644  | 0.7705277  |
| H | -2.8204486 | 1.1489228  | -1.1111649 |
| H | -3.3093927 | 2.0814582  | 0.2979326  |
| C | -1.2490994 | -0.6451671 | 0.2722740  |
| H | 0.3535595  | 0.3637038  | 1.2320144  |
| C | 1.1601123  | -0.9575851 | -0.2355396 |
| H | -1.4720054 | -1.2820717 | -0.5822507 |
| H | -2.1791799 | 0.4969584  | 1.8031697  |
| H | -3.3068811 | -0.3849595 | 0.7769302  |
| H | 0.8230982  | -1.4714542 | -1.1421440 |
| O | 1.2410792  | -1.9560437 | 0.8170847  |
| C | 2.6099436  | -0.4884809 | -0.4672115 |
| C | 2.7283203  | 0.2194233  | -1.8185759 |
| C | 3.5107240  | -1.7251847 | -0.5405337 |
| C | 3.0924041  | 0.4134367  | 0.6640860  |
| H | 2.3617859  | -0.4212288 | -2.6252343 |
| H | 3.7810164  | 0.4308022  | -2.0201186 |
| H | 2.1913614  | 1.1639308  | -1.8676857 |
| H | 2.5341933  | 1.3508886  | 0.7128910  |
| H | 4.1458649  | 0.6641482  | 0.5189354  |
| H | 3.0002839  | -0.0909630 | 1.6286196  |
| H | 3.1430548  | -2.4348917 | -1.2866110 |
| H | 3.5699788  | -2.2447255 | 0.4145060  |
| H | 4.5187169  | -1.4213531 | -0.8321388 |
| S | 0.1714852  | -3.1077278 | 0.9059004  |
| O | 0.7494141  | -4.0690781 | 1.7835932  |
| O | -0.2433070 | -3.4901362 | -0.4097999 |
| C | -1.1810903 | -2.3222283 | 1.7335603  |
| C | -0.9029567 | -1.6887360 | 2.9696187  |
| C | -1.9172149 | -1.4863925 | 3.8769242  |
| H | 0.1048748  | -1.3531813 | 3.1794946  |
| C | -3.1999151 | -1.9785198 | 3.6336469  |
| H | -1.7064950 | -0.9641817 | 4.8031668  |
| C | -3.4505738 | -2.7043290 | 2.4701983  |
| H | -3.9874863 | -1.8270969 | 4.3612891  |
| C | -2.4542406 | -2.9122546 | 1.5430854  |
| H | -4.4333600 | -3.1282821 | 2.2989352  |
| H | -2.6311988 | -3.4973781 | 0.6490859  |
| H | 0.8685983  | 1.8737490  | -0.6225206 |

## 2n-TS2Ba

E(PBE0-D3/def2-TZVP) = -1285.881516641 (conv)

Lowest Freq. = -399.07 cm<sup>-1</sup>

46

2n-TS2Ba (TS002B/c1/pbe0-d3.def2-TZVP)

|   |            |            |            |
|---|------------|------------|------------|
| C | -2.3757768 | 0.0868560  | 0.9926646  |
| C | -2.9188684 | 0.4546354  | -0.3819659 |
| C | -0.9067020 | -0.1867725 | 1.0216074  |
| H | -2.8799734 | -0.8316158 | 1.3354532  |
| H | -2.6287621 | 0.8523843  | 1.7307414  |
| C | -0.3395131 | -0.9890112 | -0.1202523 |



|   |            |            |            |
|---|------------|------------|------------|
| H | -0.5315287 | -0.4991533 | 1.9941500  |
| C | -2.4162982 | -0.5009722 | -1.4481061 |
| H | -2.6086869 | 1.4703266  | -0.6349285 |
| H | -4.0118671 | 0.4584719  | -0.3527825 |
| C | -0.8958005 | -0.5569065 | -1.4727053 |
| H | -0.6993859 | -2.0182909 | 0.0556170  |
| C | 1.1766620  | -1.0814581 | 0.0164797  |
| H | -0.5760716 | -1.2597735 | -2.2422830 |
| H | -0.4885959 | 0.4200672  | -1.7484590 |
| H | -2.8073439 | -1.5085328 | -1.2550352 |
| H | -2.7924403 | -0.2058300 | -2.4315277 |
| H | 1.3710682  | -1.4651137 | 1.0230901  |
| O | 1.7452006  | 0.2475238  | -0.0386993 |
| C | 2.0007547  | -1.9554593 | -0.9459850 |
| C | 1.3237856  | -3.3155170 | -1.0860153 |
| C | 3.3753375  | -2.1528172 | -0.3022778 |
| C | 2.2117266  | -1.3217859 | -2.3203203 |
| H | 1.1515114  | -3.7779973 | -0.1097279 |
| H | 1.9650586  | -3.9880243 | -1.6604220 |
| H | 0.3658005  | -3.2481684 | -1.6060643 |
| H | 1.2921085  | -1.2413928 | -2.8980492 |
| H | 2.9076672  | -1.9381672 | -2.8947462 |
| H | 2.6451907  | -0.3254194 | -2.2279151 |
| H | 3.2894511  | -2.6408747 | 0.6720550  |
| H | 3.8826282  | -1.1973382 | -0.1583095 |
| H | 4.0040722  | -2.7777962 | -0.9406024 |
| S | 1.6998693  | 1.1398733  | 1.2624429  |
| O | 2.6066712  | 2.2054668  | 0.9979423  |
| O | 1.8712920  | 0.3145233  | 2.4197629  |
| C | 0.0445673  | 1.7786510  | 1.2610957  |
| C | -0.2997126 | 2.6031181  | 0.1536123  |
| C | -1.2492418 | 3.5873589  | 0.2935721  |
| H | 0.1938372  | 2.4434976  | -0.7966456 |
| C | -1.8292051 | 3.8494683  | 1.5348216  |
| H | -1.5284055 | 4.1825010  | -0.5684517 |
| C | -1.4077152 | 3.1305929  | 2.6548923  |
| H | -2.5680366 | 4.6343933  | 1.6367227  |
| C | -0.4573242 | 2.1441943  | 2.5411744  |
| H | -1.8122137 | 3.3677416  | 3.6322281  |
| H | -0.0947908 | 1.6125428  | 3.4121513  |

## 2n-TS2Bb

E(PBE0-D3/def2-TZVP) = -1285.873720036 (conv)

Lowest Freq. = -383.25 cm<sup>-1</sup>

46

2n-TS2Bb (TS002B/c2/pbe0-d3.def2-TZVP)

|   |            |            |            |
|---|------------|------------|------------|
| C | -2.2731686 | 0.3009741  | 0.1817790  |
| C | -2.6485935 | 1.4155881  | -0.7951654 |
| C | -0.7937734 | 0.1291220  | 0.2630347  |
| H | -2.7269128 | -0.6273683 | -0.1832981 |
| H | -2.6902181 | 0.4861006  | 1.1739538  |
| C | -0.0871531 | -0.0530418 | -1.0476325 |
| H | -0.2904759 | 0.7698610  | 0.9812732  |
| C | -2.0233372 | 1.1403697  | -2.1514868 |
| H | -2.2956414 | 2.3822635  | -0.4173832 |
| H | -3.7373992 | 1.4837998  | -0.8729817 |
| C | -0.5106729 | 1.0458571  | -2.0368151 |
| H | -0.4651322 | -0.9885866 | -1.4790277 |
| C | 1.4351108  | -0.2603683 | -0.8931196 |
| H | -0.0662765 | 0.8446634  | -3.0152941 |

|   |            |            |            |
|---|------------|------------|------------|
| H | -0.1345813 | 2.0160613  | -1.7042783 |
| H | -2.4243518 | 0.2022763  | -2.5536907 |
| H | -2.2866440 | 1.9267437  | -2.8644389 |
| H | 1.7616554  | -0.9372679 | -1.6885340 |
| O | 1.6826164  | -0.9474456 | 0.3624828  |
| C | 2.4349293  | 0.9174705  | -0.8744697 |
| C | 2.0712736  | 1.9780262  | 0.1601052  |
| C | 2.5641390  | 1.5448188  | -2.2644035 |
| C | 3.8153365  | 0.3469918  | -0.5261354 |
| H | 1.1188554  | 2.4639541  | -0.0583454 |
| H | 2.8408958  | 2.7536901  | 0.1794503  |
| H | 2.0139740  | 1.5432620  | 1.1600973  |
| H | 3.8469244  | -0.0648286 | 0.4810028  |
| H | 4.5622980  | 1.1407281  | -0.5988133 |
| H | 4.0988974  | -0.4459706 | -1.2237514 |
| H | 1.7059204  | 2.1468190  | -2.5523890 |
| H | 2.7172540  | 0.7789808  | -3.0298973 |
| H | 3.4392459  | 2.1984846  | -2.2774833 |
| S | 0.9046203  | -2.2682540 | 0.7189506  |
| O | 1.6968944  | -2.8960696 | 1.7226220  |
| O | 0.5732689  | -2.9637893 | -0.4877964 |
| C | -0.5917471 | -1.6748551 | 1.4684891  |
| C | -0.4664625 | -1.0758999 | 2.7566800  |
| C | -1.5336167 | -1.0713645 | 3.6175850  |
| H | 0.4687679  | -0.6015571 | 3.0283852  |
| C | -2.7155270 | -1.7473388 | 3.2933950  |
| H | -1.4451572 | -0.5683150 | 4.5735488  |
| C | -2.7952517 | -2.4590268 | 2.0995637  |
| H | -3.5457021 | -1.7537183 | 3.9887113  |
| C | -1.7414655 | -2.4659256 | 1.2117243  |
| H | -3.6851261 | -3.0346393 | 1.8719472  |
| H | -1.7784899 | -3.0512755 | 0.3018492  |

## 2n-INT2Aa

E(PBE0-D3/def2-TZVP) = -1285.906985522 (conv)

Lowest Freq. = 23.68 cm<sup>-1</sup>

46

2n-INT2Aa (002\_spiroA/c1/pbe0-d3.def2-TZVP)

|   |            |            |            |
|---|------------|------------|------------|
| C | -2.4214748 | -1.7230014 | -0.2046301 |
| C | -2.8964248 | -0.5516724 | 0.6421574  |
| C | -0.9054181 | -1.8436180 | -0.1935055 |
| H | -2.7544057 | -1.5817344 | -1.2410405 |
| H | -2.8807386 | -2.6518826 | 0.1442651  |
| C | -0.2661432 | -0.5396942 | -0.6543264 |
| H | -0.5890692 | -2.6520760 | -0.8598165 |
| C | -2.2077434 | 0.7537831  | 0.2607619  |
| H | -2.7148389 | -0.7696059 | 1.6970191  |
| H | -3.9782627 | -0.4269065 | 0.5386950  |
| C | -0.6810530 | 0.6710802  | 0.1896765  |
| H | -0.7045279 | -0.3223128 | -1.6355444 |
| C | 1.2534007  | -0.6585676 | -0.8551771 |
| H | -2.5604448 | 1.0578357  | -0.7317856 |
| H | -2.4976504 | 1.5517795  | 0.9498363  |
| H | 1.5940619  | -1.6245874 | -0.4725389 |
| O | 1.9499109  | 0.3567845  | -0.0905372 |
| C | 1.7473635  | -0.5184851 | -2.3000845 |
| C | 1.1175384  | -1.6309475 | -3.1347239 |
| C | 3.2648736  | -0.6913687 | -2.3178981 |
| C | 1.3855967  | 0.8449561  | -2.8816401 |
| H | 1.3650691  | -2.6165866 | -2.7312461 |

|   |            |            |            |
|---|------------|------------|------------|
| H | 1.4998125  | -1.5845236 | -4.1568500 |
| H | 0.0296461  | -1.5479623 | -3.1873632 |
| H | 0.3044880  | 1.0001011  | -2.9258987 |
| H | 1.7676854  | 0.9268739  | -3.9018246 |
| H | 1.8251354  | 1.6509954  | -2.2915966 |
| H | 3.5533799  | -1.6556665 | -1.8908281 |
| H | 3.7613860  | 0.0931162  | -1.7464682 |
| H | 3.6344213  | -0.6536804 | -3.3453849 |
| S | 1.7286391  | 0.2877803  | 1.4734892  |
| O | 2.6162993  | 1.2522316  | 2.0289224  |
| O | 1.7926513  | -1.0823363 | 1.8871092  |
| C | -0.0260030 | 0.8647936  | 1.6095608  |
| C | 0.0031123  | 2.3308654  | 1.8909776  |
| C | -0.5404491 | 2.8791515  | 3.0058473  |
| H | 0.4786147  | 2.9581901  | 1.1462504  |
| C | -1.1403350 | 2.0800477  | 3.9966763  |
| H | -0.5034630 | 3.9548297  | 3.1359634  |
| C | -1.1514943 | 0.6838603  | 3.8332858  |
| H | -1.5639696 | 2.5317631  | 4.8840208  |
| C | -0.6301741 | 0.0868161  | 2.7294501  |
| H | -1.5794214 | 0.0611413  | 4.6111395  |
| H | -0.6041168 | -0.9906991 | 2.6571491  |
| H | -0.5390402 | -2.1105386 | 0.8020039  |
| H | -0.3364242 | 1.5496777  | -0.3635475 |

## 2n-INT2Ab

E(PBE0-D3/def2-TZVP) = -1285.914165913 (conv)

Lowest Freq. = 39.87 cm<sup>-1</sup>

46

2n-INT2Ab (002\_spiroA/c2/pbe0-d3.def2-TZVP)

|   |            |            |            |
|---|------------|------------|------------|
| C | -2.5369677 | -1.5561380 | -0.9896035 |
| C | -3.1825783 | -0.8541737 | 0.1879598  |
| C | -1.0606684 | -1.8165390 | -0.7383767 |
| H | -2.6449854 | -0.9309744 | -1.8843944 |
| H | -3.0418568 | -2.5015426 | -1.2068688 |
| C | -0.2717429 | -0.5527807 | -0.3952934 |
| H | -0.6355567 | -2.2801213 | -1.6274063 |
| C | -2.4331021 | 0.4257220  | 0.5001868  |
| H | -3.1662315 | -1.5139535 | 1.0639692  |
| H | -4.2332372 | -0.6340312 | -0.0200514 |
| C | -0.9549258 | 0.1720582  | 0.7827617  |
| H | -0.3012233 | 0.1097637  | -1.2686610 |
| C | 1.1998669  | -0.8414690 | -0.0838523 |
| H | -0.8801812 | -0.4845138 | 1.6593183  |
| H | -2.5180368 | 1.1161325  | -0.3471013 |
| H | -2.8767731 | 0.9366506  | 1.3583375  |
| H | 1.2689238  | -1.4277048 | 0.8392122  |
| O | 1.8268926  | 0.4433103  | 0.1825358  |
| C | 2.0935069  | -1.5235965 | -1.1445644 |
| C | 1.8990483  | -3.0416566 | -1.1175113 |
| C | 3.5596797  | -1.2722153 | -0.7760552 |
| C | 1.8319620  | -0.9675162 | -2.5403408 |
| H | 2.0803726  | -3.4368094 | -0.1143960 |
| H | 2.6247607  | -3.5059268 | -1.7893765 |
| H | 0.9104797  | -3.3668137 | -1.4331945 |
| H | 0.8272312  | -1.2020262 | -2.8989525 |
| H | 2.5430408  | -1.3947961 | -3.2513277 |
| H | 1.9579341  | 0.1177269  | -2.5569291 |
| H | 3.7632727  | -1.5707664 | 0.2556379  |
| H | 3.8345763  | -0.2240687 | -0.8808106 |

|   |            |            |            |
|---|------------|------------|------------|
| H | 4.2008736  | -1.8651985 | -1.4322366 |
| S | 1.4498514  | 1.1434107  | 1.5449854  |
| O | 2.2384320  | 2.3258848  | 1.6019131  |
| O | 1.5014066  | 0.1826047  | 2.6069339  |
| C | -0.3037284 | 1.5279323  | 1.2042150  |
| C | -0.3386905 | 2.5592011  | 0.1291570  |
| C | -0.8047074 | 3.8154858  | 0.3479380  |
| H | 0.0502180  | 2.2824085  | -0.8423517 |
| C | -1.2927944 | 4.2138020  | 1.6058834  |
| H | -0.7987618 | 4.5286470  | -0.4688427 |
| C | -1.3169993 | 3.2834170  | 2.6620167  |
| H | -1.6479135 | 5.2243355  | 1.7593526  |
| C | -0.8723312 | 2.0120456  | 2.4960263  |
| H | -1.7073715 | 3.5843306  | 3.6278504  |
| H | -0.8900316 | 1.3013531  | 3.3139738  |
| H | -0.9509328 | -2.5408904 | 0.0783342  |

## 2n-INT2Ba

E(PBE0-D3/def2-TZVP) = -1285.909118767 (conv)

Lowest Freq. = 41.41 cm<sup>-1</sup>

46

2n-INT2Ba (002\_spiroB/c1/pbe0-d3.def2-TZVP)

|   |            |            |            |
|---|------------|------------|------------|
| C | -2.4169087 | 0.0205353  | 0.9619434  |
| C | -2.9608214 | 0.4163309  | -0.4018711 |
| C | -0.8899576 | -0.0461611 | 1.0246607  |
| H | -2.7986475 | -0.9754269 | 1.2156983  |
| H | -2.7838416 | 0.7009664  | 1.7344786  |
| C | -0.3378153 | -0.9117613 | -0.1294079 |
| H | -0.6244965 | -0.5696123 | 1.9497758  |
| C | -2.4163442 | -0.4930525 | -1.4887838 |
| H | -2.6961443 | 1.4541889  | -0.6201449 |
| H | -4.0535244 | 0.3714629  | -0.3836147 |
| C | -0.8938035 | -0.5334475 | -1.4990165 |
| H | -0.7275769 | -1.9156131 | 0.0878711  |
| C | 1.1760289  | -1.0470169 | 0.0066176  |
| H | -0.5729286 | -1.2733167 | -2.2329806 |
| H | -0.4895748 | 0.4226796  | -1.8375573 |
| H | -2.7922824 | -1.5113678 | -1.3252834 |
| H | -2.7846088 | -0.1818596 | -2.4702396 |
| H | 1.3564796  | -1.4757929 | 0.9982021  |
| O | 1.7771925  | 0.2738375  | 0.0151003  |
| C | 1.9906929  | -1.9002303 | -0.9797704 |
| C | 1.3012569  | -3.2506572 | -1.1521560 |
| C | 3.3637685  | -2.1297641 | -0.3430968 |
| C | 2.2083681  | -1.2283720 | -2.3346911 |
| H | 1.1355974  | -3.7376151 | -0.1867530 |
| H | 1.9322289  | -3.9118185 | -1.7504921 |
| H | 0.3384401  | -3.1644054 | -1.6595420 |
| H | 1.2886259  | -1.1064161 | -2.9044279 |
| H | 2.8870447  | -1.8414902 | -2.9328146 |
| H | 2.6658453  | -0.2458948 | -2.2119216 |
| H | 3.2734644  | -2.6466630 | 0.6158485  |
| H | 3.8798485  | -1.1840619 | -0.1701693 |
| H | 3.9858025  | -2.7412493 | -1.0007713 |
| S | 1.5464822  | 1.1139821  | 1.3368723  |
| O | 2.2563388  | 2.3316940  | 1.1441098  |
| O | 1.8140023  | 0.2902596  | 2.4786242  |
| C | -0.2702802 | 1.3834229  | 1.2301842  |
| C | -0.4815021 | 2.3812747  | 0.1436539  |
| C | -0.9817417 | 3.6221755  | 0.3819696  |

|   |            |           |            |
|---|------------|-----------|------------|
| H | -0.1623235 | 2.1136260 | -0.8532871 |
| C | -1.3474538 | 4.0383817 | 1.6730156  |
| H | -1.0948647 | 4.3088397 | -0.4495396 |
| C | -1.1785012 | 3.1501532 | 2.7519740  |
| H | -1.7401756 | 5.0329973 | 1.8379901  |
| C | -0.6796895 | 1.9017197 | 2.5699299  |
| H | -1.4565729 | 3.4657268 | 3.7514264  |
| H | -0.5451267 | 1.2288117 | 3.4083865  |

## 2n-INT2Bb

E(PBE0-D3/def2-TZVP) = -1285.904893825 (conv)

Lowest Freq. = 40.27 cm<sup>-1</sup>

46

2n-INT2Bb (002\_spiroB/c2/pbe0-d3.def2-TZVP)

|   |            |            |            |
|---|------------|------------|------------|
| C | -2.1275122 | 0.8579397  | -0.3575888 |
| C | -2.8986556 | 0.0618715  | -1.3985779 |
| C | -0.6279207 | 0.6772675  | -0.5547732 |
| H | -2.3998608 | 0.5312575  | 0.6527299  |
| H | -2.3852344 | 1.9180111  | -0.4218800 |
| C | -0.2534963 | -0.8106099 | -0.4091585 |
| C | -2.4804694 | -1.3990984 | -1.4030772 |
| H | -2.7083295 | 0.4953498  | -2.3876656 |
| H | -3.9741577 | 0.1499499  | -1.2215681 |
| C | -0.9708621 | -1.5658557 | -1.5264747 |
| H | -0.6765557 | -1.1710472 | 0.5377205  |
| C | 1.2706928  | -0.9610757 | -0.2716275 |
| H | -0.7322803 | -2.6282933 | -1.4937723 |
| H | -0.6293343 | -1.1943021 | -2.4988500 |
| H | -2.8096111 | -1.8713358 | -0.4690531 |
| H | -2.9808523 | -1.9354534 | -2.2141172 |
| H | 1.5152405  | -0.7620657 | 0.7770292  |
| O | 1.8955513  | 0.0895047  | -1.0462736 |
| C | 1.9982656  | -2.2754465 | -0.5895855 |
| C | 1.3555969  | -3.3978804 | 0.2221762  |
| C | 3.4455214  | -2.1134624 | -0.1163668 |
| C | 2.0248029  | -2.6101651 | -2.0794190 |
| H | 1.3714448  | -3.1654524 | 1.2910611  |
| H | 1.9180608  | -4.3232761 | 0.0792244  |
| H | 0.3216563  | -3.5916341 | -0.0655452 |
| H | 1.0481920  | -2.8833592 | -2.4744869 |
| H | 2.6962962  | -3.4560788 | -2.2458269 |
| H | 2.4045995  | -1.7656862 | -2.6571287 |
| H | 3.4907669  | -1.8570247 | 0.9451391  |
| H | 3.9585852  | -1.3274084 | -0.6711464 |
| H | 3.9904423  | -3.0485724 | -0.2645377 |
| S | 1.9598280  | 1.4786445  | -0.2769604 |
| O | 2.2173809  | 2.4443207  | -1.2951718 |
| O | 2.8350661  | 1.3608002  | 0.8472689  |
| C | 0.1839017  | 1.6492163  | 0.3390528  |
| C | -0.1742729 | 3.0670432  | 0.0542340  |
| C | -0.4367559 | 3.9664605  | 1.0362509  |
| H | -0.1813292 | 3.3653317  | -0.9867902 |
| C | -0.4220642 | 3.5945310  | 2.3931104  |
| H | -0.6713566 | 4.9896373  | 0.7651909  |
| C | -0.1551507 | 2.2573899  | 2.7342451  |
| H | -0.6275687 | 4.3256884  | 3.1639657  |
| C | 0.1229068  | 1.3232497  | 1.7876274  |
| H | -0.1764686 | 1.9597448  | 3.7765620  |
| H | 0.3145802  | 0.3019864  | 2.0897340  |
| H | -0.3942064 | 0.9649390  | -1.5876369 |

## 2n-TS3Aa

E(PBE0-D3/def2-TZVP) = -1285.899083150 (conv)

Lowest Freq. = -273.98 cm<sup>-1</sup>

46

2n-TS3Aa (TS003A/c1/pbe0-d3.def2-TZVP)

|   |            |            |            |
|---|------------|------------|------------|
| C | -2.5086599 | -1.5835349 | -0.3720377 |
| C | -3.0303181 | -0.4301318 | 0.4705111  |
| C | -0.9893985 | -1.6669573 | -0.3437304 |
| H | -2.8343536 | -1.4418342 | -1.4103974 |
| H | -2.9420197 | -2.5303943 | -0.0384238 |
| C | -0.3428864 | -0.3334384 | -0.7164689 |
| H | -0.6541171 | -2.4385800 | -1.0391350 |
| C | -2.3849035 | 0.8821031  | 0.0560726  |
| H | -2.8296714 | -0.6211616 | 1.5296462  |
| H | -4.1166350 | -0.3516359 | 0.3724909  |
| C | -0.8505957 | 0.8506288  | 0.1288722  |
| H | -0.7085129 | -0.0915103 | -1.7222911 |
| C | 1.1889381  | -0.4461650 | -0.8068266 |
| H | -2.6647092 | 1.1037696  | -0.9807815 |
| H | -2.7610163 | 1.7059682  | 0.6680319  |
| H | 1.5305750  | -1.2690439 | -0.1697792 |
| O | 1.8173207  | 0.7599753  | -0.3236177 |
| C | 1.7706110  | -0.6613800 | -2.2168869 |
| C | 1.1544128  | -1.9009963 | -2.8574798 |
| C | 3.2771801  | -0.8786968 | -2.0834017 |
| C | 1.5129152  | 0.5523061  | -3.1065491 |
| H | 1.3070963  | -2.7909931 | -2.2412870 |
| H | 1.6315450  | -2.0824189 | -3.8233957 |
| H | 0.0837921  | -1.7843666 | -3.0392512 |
| H | 0.4455780  | 0.7302504  | -3.2603086 |
| H | 1.9602089  | 0.3881271  | -4.0897178 |
| H | 1.9527021  | 1.4544606  | -2.6800611 |
| H | 3.4932293  | -1.7451766 | -1.4525727 |
| H | 3.7660405  | -0.0096720 | -1.6425330 |
| H | 3.7190389  | -1.0580769 | -3.0664498 |
| S | 1.8217554  | 0.9532033  | 1.2650317  |
| O | 2.4332179  | 2.2327741  | 1.4712955  |
| O | 2.3748188  | -0.2263653 | 1.8772560  |
| C | -0.4078202 | 1.0190001  | 1.5888937  |
| C | -0.5492696 | 2.3626890  | 2.0828758  |
| C | -0.6308415 | 2.6386591  | 3.4215790  |
| H | -0.5333484 | 3.1724392  | 1.3621729  |
| C | -0.6512416 | 1.6016485  | 4.3571960  |
| H | -0.6866958 | 3.6686150  | 3.7536173  |
| C | -0.6193762 | 0.2796716  | 3.9140797  |
| H | -0.7079664 | 1.8215173  | 5.4160189  |
| C | -0.5430365 | -0.0156699 | 2.5754073  |
| H | -0.6613546 | -0.5301951 | 4.6328985  |
| H | -0.4987043 | -1.0497793 | 2.2711120  |
| H | -0.6440899 | -1.9935466 | 0.6399846  |
| H | -0.4894337 | 1.7539147  | -0.3716600 |

## 2n-TS3Ab

E(PBE0-D3/def2-TZVP) = -1285.901521818 (conv)

Lowest Freq. = -277.16 cm<sup>-1</sup>

46

2n-TS3Ab (TS003A/c2/pbe0-d3.def2-TZVP)

|   |            |            |            |
|---|------------|------------|------------|
| C | -2.5289138 | -1.7039610 | -1.0332850 |
| C | -3.2246079 | -1.0973076 | 0.1655295  |

|   |            |            |            |
|---|------------|------------|------------|
| C | -1.0374836 | -1.8345579 | -0.7827914 |
| H | -2.6983889 | -1.0672951 | -1.9102582 |
| H | -2.9432324 | -2.6866665 | -1.2752265 |
| C | -0.3357330 | -0.5237198 | -0.4179315 |
| H | -0.5740434 | -2.2470112 | -1.6765976 |
| C | -2.5981191 | 0.2432679  | 0.4828198  |
| H | -3.1271133 | -1.7676667 | 1.0279818  |
| H | -4.2952665 | -0.9751400 | -0.0206294 |
| C | -1.0856625 | 0.1645653  | 0.7494233  |
| H | -0.3771016 | 0.1343671  | -1.2938591 |
| C | 1.1450142  | -0.7723333 | -0.0871428 |
| H | -0.9354039 | -0.4555990 | 1.6429489  |
| H | -2.7649319 | 0.9303602  | -0.3555892 |
| H | -3.0777930 | 0.7026660  | 1.3508919  |
| H | 1.2090037  | -1.3436411 | 0.8458644  |
| O | 1.7694950  | 0.5115981  | 0.1502902  |
| C | 2.0618991  | -1.4744974 | -1.1231170 |
| C | 1.8948708  | -2.9962443 | -1.0761981 |
| C | 3.5194327  | -1.2017139 | -0.7309446 |
| C | 1.8260688  | -0.9412880 | -2.5324806 |
| H | 2.0318436  | -3.3687505 | -0.0574219 |
| H | 2.6658340  | -3.4562134 | -1.6988322 |
| H | 0.9337481  | -3.3524692 | -1.4379783 |
| H | 0.8301381  | -1.1840100 | -2.9096045 |
| H | 2.5533994  | -1.3758063 | -3.2224905 |
| H | 1.9482545  | 0.1440642  | -2.5613079 |
| H | 3.7050981  | -1.4779323 | 0.3103815  |
| H | 3.7881149  | -0.1538875 | -0.8517231 |
| H | 4.1779673  | -1.8023871 | -1.3624984 |
| S | 1.5167513  | 1.1814316  | 1.5784545  |
| O | 2.3388773  | 2.3554020  | 1.5859116  |
| O | 1.6637619  | 0.1799320  | 2.6080817  |
| C | -0.6834431 | 1.5920407  | 1.1170535  |
| C | -0.5301915 | 2.5751127  | 0.0980967  |
| C | -0.5766099 | 3.9165237  | 0.3982827  |
| H | -0.3163226 | 2.2572445  | -0.9143452 |
| C | -0.8513735 | 4.3467885  | 1.6943513  |
| H | -0.4045652 | 4.6450497  | -0.3853762 |
| C | -1.1212075 | 3.4059068  | 2.6899037  |
| H | -0.8746314 | 5.4047793  | 1.9238284  |
| C | -1.0839832 | 2.0639611  | 2.4057663  |
| H | -1.3711842 | 3.7357733  | 3.6914593  |
| H | -1.2903308 | 1.3320797  | 3.1792120  |
| H | -0.8719351 | -2.5628150 | 0.0210962  |

## 2n-TS3Ba

E(PBE0-D3/def2-TZVP) = -1285.899233573 (conv)

Lowest Freq. = -284.40 cm<sup>-1</sup>

46

2n-TS3Ba (TS003B/c1/pbe0-d3.def2-TZVP)

|   |            |            |            |
|---|------------|------------|------------|
| C | -2.5121141 | -0.2289415 | 0.9089419  |
| C | -3.0678017 | 0.1983107  | -0.4391393 |
| C | -0.9850847 | -0.0804423 | 0.9925992  |
| H | -2.7564611 | -1.2841641 | 1.0789818  |
| H | -2.9798972 | 0.3397633  | 1.7167716  |
| C | -0.3412734 | -0.8797505 | -0.1644018 |
| H | -0.6606096 | -0.5739657 | 1.9158023  |
| C | -2.4158991 | -0.5845585 | -1.5673191 |
| H | -2.9060080 | 1.2712420  | -0.5814081 |
| H | -4.1507145 | 0.0464948  | -0.4552114 |

|   |            |            |            |
|---|------------|------------|------------|
| C | -0.8923940 | -0.5170888 | -1.5401658 |
| H | -0.6805444 | -1.9065749 | 0.0294441  |
| C | 1.1753838  | -0.9603128 | -0.0061540 |
| H | -0.5091091 | -1.2241400 | -2.2763126 |
| H | -0.5371466 | 0.4638588  | -1.8609463 |
| H | -2.7152747 | -1.6369273 | -1.4811110 |
| H | -2.7844490 | -0.2388294 | -2.5370405 |
| H | 1.3514221  | -1.3537214 | 1.0012431  |
| O | 1.7625419  | 0.3600750  | -0.0475505 |
| C | 2.0119841  | -1.8436066 | -0.9524059 |
| C | 1.3350432  | -3.2024061 | -1.1056631 |
| C | 3.3723147  | -2.0486820 | -0.2808388 |
| C | 2.2563341  | -1.2088647 | -2.3208489 |
| H | 1.1383690  | -3.6609623 | -0.1321321 |
| H | 1.9895036  | -3.8780854 | -1.6611681 |
| H | 0.3902470  | -3.1375838 | -1.6492733 |
| H | 1.3481698  | -1.1049995 | -2.9127553 |
| H | 2.9481955  | -1.8366902 | -2.8879177 |
| H | 2.7080352  | -0.2218319 | -2.2160927 |
| H | 3.2644875  | -2.5455612 | 0.6867980  |
| H | 3.8765915  | -1.0951600 | -0.1159962 |
| H | 4.0141606  | -2.6683754 | -0.9113090 |
| S | 1.6027784  | 1.2156547  | 1.2990893  |
| O | 2.2741760  | 2.4517655  | 1.0299546  |
| O | 1.9935290  | 0.4063155  | 2.4274267  |
| C | -0.6510837 | 1.4020984  | 1.2086617  |
| C | -0.7436090 | 2.3863794  | 0.1741307  |
| C | -0.8782805 | 3.7214801  | 0.4718622  |
| H | -0.6236483 | 2.0876122  | -0.8558327 |
| C | -1.0101157 | 4.1532978  | 1.7895184  |
| H | -0.8853453 | 4.4451412  | -0.3347374 |
| C | -1.0333896 | 3.2102945  | 2.8194035  |
| H | -1.1074942 | 5.2084842  | 2.0119564  |
| C | -0.9008905 | 1.8747074  | 2.5414339  |
| H | -1.1677949 | 3.5329426  | 3.8452662  |
| H | -0.9168344 | 1.1463080  | 3.3444461  |

## 2n-TS3Bb

E(PBE0-D3/def2-TZVP) = -1285.900149534 (conv)

Lowest Freq. = -276.65 cm<sup>-1</sup>

46

2n-TS3Bb (TS003B/c2/pbe0-d3.def2-TZVP)

|   |            |            |            |
|---|------------|------------|------------|
| C | -2.5258548 | 0.9113013  | -0.1909890 |
| C | -3.2103512 | 0.1145298  | -1.2884803 |
| C | -1.0049151 | 0.8387570  | -0.3331938 |
| H | -2.8120481 | 0.5266484  | 0.7951898  |
| H | -2.8455740 | 1.9562951  | -0.2211797 |
| C | -0.5373237 | -0.6283072 | -0.2429729 |
| C | -2.7063161 | -1.3176477 | -1.3210334 |
| H | -3.0067461 | 0.5930715  | -2.2538613 |
| H | -4.2951202 | 0.1359444  | -1.1515579 |
| C | -1.1869998 | -1.3897731 | -1.3967015 |
| H | -0.9380296 | -1.0535877 | 0.6871632  |
| C | 0.9909148  | -0.7072733 | -0.1136169 |
| H | -0.8878908 | -2.4368415 | -1.3801275 |
| H | -0.8356025 | -0.9758097 | -2.3484354 |
| H | -3.0380038 | -1.8366305 | -0.4129373 |
| H | -3.1456816 | -1.8579752 | -2.1641615 |
| H | 1.2331464  | -0.4210181 | 0.9151386  |
| O | 1.5789973  | 0.2941835  | -0.9746378 |



|   |            |            |            |
|---|------------|------------|------------|
| C | 1.7521990  | -2.0260135 | -0.3308067 |
| C | 1.0981059  | -3.1181030 | 0.5118982  |
| C | 3.1767262  | -1.8091749 | 0.1871104  |
| C | 1.8470329  | -2.4410142 | -1.7981578 |
| H | 1.0555714  | -2.8275693 | 1.5658551  |
| H | 1.6885180  | -4.0350181 | 0.4484451  |
| H | 0.0844702  | -3.3541848 | 0.1849372  |
| H | 0.8951347  | -2.7616897 | -2.2173153 |
| H | 2.5452727  | -3.2767004 | -1.8897918 |
| H | 2.2289067  | -1.6197362 | -2.4066643 |
| H | 3.1768626  | -1.5151942 | 1.2397365  |
| H | 3.6880956  | -1.0274887 | -0.3757445 |
| H | 3.7519488  | -2.7329162 | 0.0908609  |
| S | 1.6896985  | 1.7226719  | -0.2459408 |
| O | 1.8292663  | 2.6703066  | -1.3128168 |
| O | 2.6816469  | 1.6522638  | 0.7911929  |
| C | -0.3453223 | 1.8193911  | 0.6284240  |
| C | -0.5911332 | 3.2198528  | 0.3796843  |
| C | -0.4476280 | 4.1548374  | 1.3683029  |
| H | -0.8101037 | 3.5248019  | -0.6370111 |
| C | -0.1512687 | 3.7650461  | 2.6790285  |
| H | -0.5767570 | 5.2050464  | 1.1344746  |
| C | -0.0568502 | 2.4067046  | 2.9876060  |
| H | -0.0307785 | 4.5101646  | 3.4553612  |
| C | -0.1935777 | 1.4549297  | 2.0100381  |
| H | 0.1069642  | 2.0990013  | 4.0137811  |
| H | -0.1586468 | 0.4065356  | 2.2784627  |
| H | -0.7609557 | 1.1873824  | -1.3445563 |

## 2o-PhRad

E(PBE0-D3/def2-TZVP) = -1287.067723955 (conv)

Lowest Freq. = 12.63 cm<sup>-1</sup>

48

2o-PhRad (011/c2/pbe0-d3.def2-TZVP)

|   |            |            |            |
|---|------------|------------|------------|
| C | -0.9902818 | -0.5142136 | -0.9502745 |
| C | -3.3064139 | 0.2689905  | -0.3149725 |
| C | -1.8733885 | 0.0612428  | 0.1442288  |
| H | -0.9757265 | 0.1663869  | -1.8068940 |
| C | 0.4332354  | -0.7884493 | -0.5101243 |
| H | -1.4661976 | 1.0182820  | 0.4842611  |
| H | -1.8582540 | -0.6034096 | 1.0155136  |
| H | -3.3139355 | 0.9277580  | -1.1924712 |
| H | 0.4251848  | -1.3877503 | 0.4045639  |
| O | 1.0328180  | 0.4988095  | -0.1745312 |
| C | 1.3421048  | -1.4797437 | -1.5373723 |
| C | 0.7706093  | -2.8650218 | -1.8371207 |
| C | 2.7338749  | -1.6528207 | -0.9335800 |
| C | 1.4503431  | -0.6712038 | -2.8264835 |
| H | 0.6234466  | -3.4422107 | -0.9197060 |
| H | 1.4664844  | -3.4200718 | -2.4703792 |
| H | -0.1830651 | -2.8130743 | -2.3646844 |
| H | 0.4916396  | -0.6014748 | -3.3442745 |
| H | 2.1589345  | -1.1494931 | -3.5071598 |
| H | 1.8063322  | 0.3410056  | -2.6250821 |
| H | 2.6876579  | -2.1759271 | 0.0259396  |
| H | 3.2241277  | -0.6922801 | -0.7736904 |
| H | 3.3624509  | -2.2409620 | -1.6062865 |
| S | 1.3065831  | 0.9447082  | 1.3100653  |
| O | 0.8855508  | -0.0845257 | 2.2103094  |
| O | 0.8116019  | 2.2734202  | 1.4337410  |

|   |            |            |            |
|---|------------|------------|------------|
| C | 3.0667197  | 1.0089781  | 1.3452826  |
| C | 3.7920741  | 0.1112666  | 2.1242860  |
| C | 5.1772192  | 0.1848814  | 2.1288473  |
| H | 3.2582495  | -0.6250678 | 2.7131516  |
| C | 5.8413743  | 1.1353561  | 1.3652952  |
| H | 5.7451487  | -0.5086578 | 2.7368210  |
| C | 5.1248748  | 2.0424311  | 0.5815780  |
| H | 6.9248113  | 1.1796700  | 1.3768145  |
| C | 3.7650721  | 1.9318448  | 0.6166456  |
| H | 5.6304844  | 2.7915996  | -0.0160476 |
| H | -1.4238739 | -1.4552685 | -1.3005566 |
| H | -3.7275230 | -0.6870353 | -0.6513067 |
| C | -4.1984422 | 0.8603078  | 0.7626990  |
| H | -4.1924186 | 0.2021165  | 1.6404248  |
| H | -3.7739452 | 1.8135788  | 1.1000644  |
| C | -5.6318140 | 1.0795377  | 0.3085782  |
| H | -5.6343882 | 1.7371012  | -0.5685116 |
| H | -6.0531725 | 0.1252654  | -0.0285764 |
| C | -6.5140299 | 1.6724340  | 1.3932903  |
| H | -6.1308858 | 2.6414552  | 1.7247858  |
| H | -6.5530707 | 1.0187016  | 2.2691166  |
| H | -7.5381811 | 1.8215317  | 1.0437824  |

## 2o-TS1(1,8)a

E(PBE0-D3/def2-TZVP) = -1287.054539856 (conv)

Lowest Freq. = -931.44 cm<sup>-1</sup>

48

2o-TS1(1,8)a (TS005A/c2/pbe0-d3.def2-TZVP)

|   |            |            |            |
|---|------------|------------|------------|
| C | 0.3421544  | 0.1371297  | 2.1678095  |
| C | 0.9509391  | 1.5270097  | 0.0914720  |
| C | -0.0651814 | 1.2326172  | 1.1745973  |
| H | 0.0310919  | 0.4226582  | 3.1743301  |
| C | -0.1857457 | -1.2707319 | 1.9069943  |
| H | -0.2108102 | 2.1617386  | 1.7401381  |
| H | -1.0338932 | 1.0135083  | 0.7193892  |
| H | 1.9762917  | 1.3585472  | 0.4336761  |
| H | 0.5325442  | -1.9925645 | 2.3074166  |
| O | -0.2743550 | -1.4822493 | 0.4714783  |
| C | -1.5549268 | -1.6387977 | 2.5017663  |
| C | -1.4509304 | -1.5908900 | 4.0252987  |
| C | -1.8941986 | -3.0698774 | 2.0879567  |
| C | -2.6599211 | -0.6982009 | 2.0332389  |
| H | -0.6382216 | -2.2261943 | 4.3884874  |
| H | -2.3806333 | -1.9565006 | 4.4670208  |
| H | -1.2871752 | -0.5792457 | 4.4014002  |
| H | -2.4938601 | 0.3256494  | 2.3756695  |
| H | -3.6207989 | -1.0285443 | 2.4355052  |
| H | -2.7382202 | -0.6918764 | 0.9440777  |
| H | -1.1088927 | -3.7661165 | 2.3940827  |
| H | -2.0111323 | -3.1581539 | 1.0080227  |
| H | -2.8276281 | -3.3822358 | 2.5620332  |
| S | 0.9351972  | -2.1889237 | -0.2565533 |
| O | 0.7230050  | -3.6016592 | -0.2885409 |
| O | 2.1590055  | -1.6838966 | 0.2881592  |
| C | 0.6474908  | -1.5232156 | -1.8558768 |
| C | 0.4526620  | -2.3756667 | -2.9348481 |
| C | 0.2297158  | -1.8246362 | -4.1881702 |
| H | 0.4700007  | -3.4474384 | -2.7777332 |
| C | 0.1896692  | -0.4473071 | -4.3515365 |
| H | 0.0785759  | -2.4757981 | -5.0405314 |

|   |            |            |            |
|---|------------|------------|------------|
| C | 0.3821089  | 0.4014395  | -3.2624805 |
| H | 0.0057498  | -0.0254745 | -5.3336268 |
| C | 0.6165895  | -0.1585350 | -2.0300946 |
| H | 0.3451952  | 1.4769170  | -3.3956880 |
| H | 1.4328130  | 0.0853358  | 2.1924232  |
| H | 0.8324942  | 0.7066947  | -0.8123004 |
| C | 0.7961778  | 2.8669215  | -0.5871199 |
| H | -0.1442715 | 2.8879570  | -1.1532406 |
| H | 0.6922419  | 3.6474042  | 0.1798810  |
| C | 1.9596210  | 3.2231682  | -1.4991851 |
| H | 2.8719870  | 3.2914581  | -0.8968008 |
| H | 2.1343564  | 2.4066248  | -2.2070647 |
| C | 1.7435626  | 4.5228120  | -2.2534772 |
| H | 1.6039530  | 5.3605339  | -1.5645768 |
| H | 0.8523735  | 4.4686237  | -2.8857065 |
| H | 2.5932294  | 4.7599815  | -2.8971726 |

**2o-TS1(1,8)b**

E(PBE0-D3/def2-TZVP) = -1287.055189953 (conv)

Lowest Freq. = -887.89 cm<sup>-1</sup>

48

2o-TS1(1,8)b (TS005B/c1/pbe0-d3.def2-TZVP)

|   |            |            |            |
|---|------------|------------|------------|
| C | -0.1008291 | 0.3673116  | 1.8027325  |
| C | 0.3829993  | 1.7602032  | -0.3453186 |
| C | -0.5406575 | 1.4587945  | 0.8195564  |
| H | -0.4120451 | 0.6486890  | 2.8103572  |
| C | -0.6111744 | -1.0482312 | 1.5480310  |
| H | -0.6377106 | 2.3927010  | 1.3885306  |
| H | -1.5385072 | 1.2488416  | 0.4306255  |
| H | 0.2966498  | 0.8878141  | -1.2011694 |
| H | 0.1175350  | -1.7567405 | 1.9530187  |
| O | -0.6912536 | -1.2686822 | 0.1117260  |
| C | -1.9737557 | -1.4362463 | 2.1460533  |
| C | -1.8678390 | -1.3785649 | 3.6692552  |
| C | -2.2881666 | -2.8754986 | 1.7408736  |
| C | -3.0986430 | -0.5203507 | 1.6759477  |
| H | -1.0427026 | -1.9966117 | 4.0342015  |
| H | -2.7896862 | -1.7593568 | 4.1145772  |
| H | -1.7225498 | -0.3620387 | 4.0397789  |
| H | -2.9594393 | 0.5056656  | 2.0235877  |
| H | -4.0528648 | -0.8755696 | 2.0728912  |
| H | -3.1727989 | -0.5120721 | 0.5864784  |
| H | -1.4886673 | -3.5559667 | 2.0454306  |
| H | -2.4095451 | -2.9717702 | 0.6621243  |
| H | -3.2131104 | -3.2022872 | 2.2217602  |
| S | 0.5035145  | -2.0244439 | -0.5890352 |
| O | 0.2537767  | -3.4312592 | -0.5996977 |
| O | 1.7357829  | -1.5474628 | -0.0349393 |
| C | 0.2699911  | -1.3809386 | -2.2052135 |
| C | 0.1664263  | -2.2464049 | -3.2867803 |
| C | 0.0263714  | -1.7091557 | -4.5580523 |
| H | 0.1913777  | -3.3165886 | -3.1198340 |
| C | -0.0168584 | -0.3336064 | -4.7392075 |
| H | -0.0539985 | -2.3702143 | -5.4124176 |
| C | 0.0803028  | 0.5271442  | -3.6473113 |
| H | -0.1296803 | 0.0752880  | -5.7374081 |
| C | 0.2258898  | -0.0196320 | -2.3960609 |
| H | 0.0439668  | 1.6022250  | -3.7880447 |
| H | 0.9887256  | 0.3295663  | 1.8310055  |
| H | -0.0041487 | 2.6224196  | -0.9001663 |
| C | 1.8533749  | 1.9253365  | -0.0525625 |
| H | 1.9769560  | 2.6523649  | 0.7642058  |
| H | 2.2700845  | 0.9806646  | 0.3089203  |
| C | 2.6558349  | 2.3834663  | -1.2594641 |
| H | 2.5234808  | 1.6576519  | -2.0689144 |
| H | 2.2494158  | 3.3328212  | -1.6280328 |
| C | 4.1348100  | 2.5398314  | -0.9546902 |
| H | 4.5650622  | 1.5927721  | -0.6187831 |
| H | 4.2992255  | 3.2765355  | -0.1631869 |
| H | 4.6939335  | 2.8663374  | -1.8342824 |

## 2o-TS1(1,7)a

E(PBE0-D3/def2-TZVP) = -1287.061856220 (conv)

Lowest Freq. = -949.17 cm<sup>-1</sup>

48

2o-TS1(1,7)a (TS004B/c3/pbe0-d3.def2-TZVP)

|   |            |            |            |
|---|------------|------------|------------|
| C | -0.0265505 | -0.9614871 | -1.0550254 |
| C | -2.2755384 | -0.0907761 | -0.2313620 |
| C | -0.8653041 | -0.4995797 | 0.1111363  |
| H | 0.0331274  | -0.1753759 | -1.8141199 |
| C | 1.3739022  | -1.3925265 | -0.6670744 |
| H | -0.3376155 | 0.5048664  | 0.5839557  |
| H | -0.8269637 | -1.2048919 | 0.9467222  |
| H | -2.2507733 | 0.7786828  | -0.9006841 |
| H | 1.3326856  | -1.9921500 | 0.2458858  |
| O | 2.1366799  | -0.1930354 | -0.3634502 |
| C | 2.1656776  | -2.1802272 | -1.7211613 |
| C | 1.4462314  | -3.5017409 | -1.9872172 |
| C | 3.5516629  | -2.4865539 | -1.1566772 |
| C | 2.3029657  | -1.3900267 | -3.0184511 |
| H | 1.2449772  | -4.0403510 | -1.0567081 |
| H | 2.0737023  | -4.1423891 | -2.6107738 |
| H | 0.4998061  | -3.3611554 | -2.5131204 |
| H | 1.3330445  | -1.2102182 | -3.4881802 |
| H | 2.9161706  | -1.9464255 | -3.7313688 |
| H | 2.7840425  | -0.4265342 | -2.8403003 |
| H | 3.4794132  | -3.0385316 | -0.2152021 |
| H | 4.1200943  | -1.5750953 | -0.9690757 |
| H | 4.1149680  | -3.0996332 | -1.8639307 |
| S | 2.5323445  | 0.2065971  | 1.1108647  |
| O | 3.9280338  | 0.4986767  | 1.1131817  |
| O | 1.9980178  | -0.7626223 | 2.0177291  |
| C | 1.6557031  | 1.7253586  | 1.2794985  |
| C | 2.3356612  | 2.8786565  | 1.6497391  |
| C | 1.6212387  | 4.0595262  | 1.7923477  |
| H | 3.4058163  | 2.8380150  | 1.8122030  |
| C | 0.2540730  | 4.0877503  | 1.5576469  |
| H | 2.1391259  | 4.9657783  | 2.0821764  |
| C | -0.4216418 | 2.9287526  | 1.1788901  |
| H | -0.2936114 | 5.0176110  | 1.6651368  |
| C | 0.2995681  | 1.7666194  | 1.0549636  |
| H | -1.4888615 | 2.9542129  | 0.9877194  |
| H | -0.5328126 | -1.8114598 | -1.5265543 |
| H | -2.7541541 | -0.8939055 | -0.8096929 |
| C | -3.1263289 | 0.2196246  | 0.9890010  |
| H | -3.2112448 | -0.6828440 | 1.6060527  |
| H | -2.6134000 | 0.9579537  | 1.6162180  |
| C | -4.5152370 | 0.7284523  | 0.6433231  |
| H | -4.4247175 | 1.6339237  | 0.0316948  |
| H | -5.0240404 | -0.0099620 | 0.0130117  |
| C | -5.3596953 | 1.0229368  | 1.8705626  |
| H | -4.8841959 | 1.7775771  | 2.5033159  |
| H | -5.4956960 | 0.1246031  | 2.4787865  |
| H | -6.3503509 | 1.3933236  | 1.5983668  |

**2o-TS1(1,7)b**

E(PBE0-D3/def2-TZVP) = -1287.062709652 (conv)

Lowest Freq. = -949.51 cm<sup>-1</sup>

48

2o-TS1(1,7)b (TS004A/c3/pbe0-d3.def2-TZVP)

|   |            |            |            |
|---|------------|------------|------------|
| C | -0.4637553 | -0.4707349 | -1.7017679 |
| C | -1.6316213 | -0.9272039 | 0.5499908  |
| C | -1.3381379 | 0.0332531  | -0.5756154 |
| H | -0.3959526 | 0.2871388  | -2.4862402 |
| C | 0.9404738  | -0.8651724 | -1.2859074 |
| H | -2.2556608 | 0.4807029  | -0.9702125 |
| H | -0.7845812 | 1.0077626  | -0.0658810 |
| H | -2.1025485 | -1.8299744 | 0.1338522  |
| H | 0.9133055  | -1.4591951 | -0.3707945 |
| O | 1.6505478  | 0.3670283  | -0.9802849 |
| C | 1.7672704  | -1.6389916 | -2.3235630 |
| C | 1.0954255  | -2.9885023 | -2.5727045 |
| C | 3.1589861  | -1.8897158 | -1.7457959 |
| C | 1.8887843  | -0.8651366 | -3.6320653 |
| H | 0.9291080  | -3.5289571 | -1.6364220 |
| H | 1.7379122  | -3.6076478 | -3.2026844 |
| H | 0.1363189  | -2.8875998 | -3.0844557 |
| H | 0.9189723  | -0.7299592 | -4.1164969 |
| H | 2.5314527  | -1.4091681 | -4.3283468 |
| H | 2.3312811  | 0.1186923  | -3.4644782 |
| H | 3.0995135  | -2.4200240 | -0.7912067 |
| H | 3.7004775  | -0.9578033 | -1.5794214 |
| H | 3.7434610  | -2.5023997 | -2.4360226 |
| S | 2.1436770  | 0.7199761  | 0.4746715  |
| O | 3.5184663  | 1.0885480  | 0.3886252  |
| O | 1.7372323  | -0.3192002 | 1.3724129  |
| C | 1.2052734  | 2.1751434  | 0.7964647  |
| C | 1.8373625  | 3.2986051  | 1.3156335  |
| C | 1.0743319  | 4.4187926  | 1.6112138  |
| H | 2.9091169  | 3.2842377  | 1.4725993  |
| C | -0.2950415 | 4.4184623  | 1.3851141  |
| H | 1.5552778  | 5.3007613  | 2.0165727  |
| C | -0.9215639 | 3.2924132  | 0.8549071  |
| H | -0.8811280 | 5.3009379  | 1.6172174  |
| C | -0.1514966 | 2.1903799  | 0.5746828  |
| H | -1.9904778 | 3.2911825  | 0.6700728  |
| H | -0.9492070 | -1.3450803 | -2.1500370 |
| H | -0.6979334 | -1.2543929 | 1.0175471  |
| C | -2.5332721 | -0.3335942 | 1.6190875  |
| H | -2.0582075 | 0.5664109  | 2.0266624  |
| H | -3.4757832 | -0.0035755 | 1.1636122  |
| C | -2.8308667 | -1.2977899 | 2.7545429  |
| H | -3.3025386 | -2.2002792 | 2.3486830  |
| H | -1.8852572 | -1.6239778 | 3.2014665  |
| C | -3.7208302 | -0.6921701 | 3.8254420  |
| H | -4.6838083 | -0.3828007 | 3.4092653  |
| H | -3.2542997 | 0.1920476  | 4.2683454  |
| H | -3.9200591 | -1.4014299 | 4.6317189  |

**2o-TS1(1,6)a**

E(TPSS-D3/def2-TZVP) = -1287.056547430 (conv)

Lowest Freq. = -1022.71 cm<sup>-1</sup>

48

2o-TS1(1,6)a (TS006A/c1/pbe0-d3.def2-TZVP)

|   |            |            |            |
|---|------------|------------|------------|
| C | 0.1829566  | -0.8384313 | 0.6258183  |
| C | -1.9072824 | -0.4453148 | -0.7318140 |
| C | -0.4117443 | -0.7193417 | -0.7538980 |
| H | -0.2497618 | -1.6579133 | 1.2045541  |
| C | 1.6803031  | -0.7762763 | 0.8131444  |
| H | -0.2371244 | -1.6486263 | -1.3094945 |
| H | 0.1008779  | 0.0727475  | -1.3082480 |
| H | -2.4111953 | -1.2145243 | -0.1329512 |
| H | 1.8827208  | -0.8434782 | 1.8855096  |
| O | 2.1238267  | 0.5412143  | 0.3765061  |
| C | 2.5787241  | -1.8224807 | 0.1293266  |
| C | 2.0154767  | -3.2066974 | 0.4386510  |
| C | 3.9765254  | -1.7027960 | 0.7367097  |
| C | 2.6871327  | -1.6225881 | -1.3799731 |
| H | 1.9072522  | -3.3621854 | 1.5159782  |
| H | 2.6934148  | -3.9748661 | 0.0599827  |
| H | 1.0406883  | -3.3632795 | -0.0288635 |
| H | 1.7437279  | -1.7991442 | -1.8953804 |
| H | 3.4194585  | -2.3264183 | -1.7832281 |
| H | 3.0256563  | -0.6134362 | -1.6183388 |
| H | 3.9542760  | -1.8509007 | 1.8190272  |
| H | 4.4106889  | -0.7206770 | 0.5424976  |
| H | 4.6378284  | -2.4559057 | 0.3017656  |
| S | 2.4167172  | 1.6708709  | 1.4346712  |
| O | 3.1824602  | 2.6553617  | 0.7480225  |
| O | 2.9141342  | 1.0741749  | 2.6354378  |
| C | 0.8166786  | 2.3374133  | 1.7740106  |
| C | 0.7139059  | 3.6841616  | 2.1083114  |
| C | -0.5245376 | 4.1971684  | 2.4601018  |
| H | 1.5961735  | 4.3127239  | 2.0805524  |
| C | -1.6479119 | 3.3811530  | 2.4763398  |
| H | -0.6140883 | 5.2452814  | 2.7188388  |
| C | -1.5454505 | 2.0371584  | 2.1282967  |
| H | -2.6123058 | 3.7930391  | 2.7522892  |
| C | -0.3071335 | 1.5455902  | 1.7896129  |
| H | -2.4231019 | 1.4001311  | 2.1249248  |
| H | -0.1696470 | 0.1672749  | 1.2407400  |
| H | -2.0908118 | 0.5080118  | -0.2248573 |
| C | -2.5237083 | -0.3998868 | -2.1187089 |
| H | -2.0050288 | 0.3569966  | -2.7198892 |
| H | -2.3525347 | -1.3573294 | -2.6264486 |
| C | -4.0125697 | -0.0965496 | -2.1061838 |
| H | -4.5288995 | -0.8517192 | -1.5021803 |
| H | -4.1788727 | 0.8612680  | -1.5998278 |
| C | -4.6206882 | -0.0510751 | -3.4969144 |
| H | -4.4952743 | -1.0072116 | -4.0125056 |
| H | -4.1421934 | 0.7176547  | -4.1099289 |
| H | -5.6897395 | 0.1696575  | -3.4619868 |

**2o-TS1(1,6)b**

E(TPSS-D3/def2-TZVP) = -1287.057616079 (conv)

Lowest Freq. = -889.21 cm<sup>-1</sup>

48

2o-TS1(1,6)b (TS006B/c1/pbe0-d3.def2-TZVP)

|   |            |            |            |
|---|------------|------------|------------|
| C | 0.2514167  | -0.5724118 | 0.0364775  |
| C | -2.2516105 | -1.0159324 | 0.1171158  |
| C | -0.8521694 | -1.5193075 | 0.4467087  |
| H | -0.0791587 | 0.5209741  | 0.4675299  |
| C | 1.6185482  | -0.8654220 | 0.6205819  |
| H | -0.7782081 | -1.6924934 | 1.5249918  |
| H | -0.6971815 | -2.4944621 | -0.0326586 |
| H | -2.9801030 | -1.7527179 | 0.4721127  |
| H | 1.4997688  | -1.4914835 | 1.5079403  |
| O | 2.2611925  | 0.3674311  | 1.0651459  |
| C | 2.6293421  | -1.5400234 | -0.3193215 |
| C | 2.0099730  | -2.8291504 | -0.8522927 |
| C | 3.8832563  | -1.8830342 | 0.4819873  |
| C | 3.0039501  | -0.6281017 | -1.4837496 |
| H | 1.6972551  | -3.4894821 | -0.0387905 |
| H | 2.7458183  | -3.3674708 | -1.4538782 |
| H | 1.1434095  | -2.6332941 | -1.4876065 |
| H | 2.1379188  | -0.3686851 | -2.0971349 |
| H | 3.7226946  | -1.1355759 | -2.1315244 |
| H | 3.4606307  | 0.2964842  | -1.1285825 |
| H | 3.6460235  | -2.5519563 | 1.3138338  |
| H | 4.3507920  | -0.9862796 | 0.8899508  |
| H | 4.6115909  | -2.3869950 | -0.1578874 |
| S | 1.8825044  | 1.0115302  | 2.4534565  |
| O | 3.0400644  | 1.7062288  | 2.9070503  |
| O | 1.2617239  | 0.0167570  | 3.2732538  |
| C | 0.6694420  | 2.2025721  | 1.9861719  |
| C | 0.6601398  | 3.4647429  | 2.5667362  |
| C | -0.3368109 | 4.3579511  | 2.2019341  |
| H | 1.4301823  | 3.7346331  | 3.2795314  |
| C | -1.3009620 | 4.0011529  | 1.2684549  |
| H | -0.3560367 | 5.3461268  | 2.6453867  |
| C | -1.2827146 | 2.7374452  | 0.6808142  |
| H | -2.0705061 | 4.7121076  | 0.9885259  |
| C | -0.2931821 | 1.8684312  | 1.0665376  |
| H | -2.0273044 | 2.4586426  | -0.0569869 |
| H | 0.2874563  | -0.3896731 | -1.0384199 |
| H | -2.4442969 | -0.1016085 | 0.6903074  |
| C | -2.4995778 | -0.7471532 | -1.3579493 |
| H | -1.8165565 | 0.0305113  | -1.7192989 |
| H | -2.2648686 | -1.6484121 | -1.9390018 |
| C | -3.9274905 | -0.3172061 | -1.6510366 |
| H | -4.6161919 | -1.0966447 | -1.3060683 |
| H | -4.1626232 | 0.5740433  | -1.0570408 |
| C | -4.1719165 | -0.0309137 | -3.1220188 |
| H | -3.9753364 | -0.9164613 | -3.7326470 |
| H | -3.5169581 | 0.7675135  | -3.4820899 |
| H | -5.2033297 | 0.2770728  | -3.3065525 |



## 2o-TS1(1,5)

E(TPSS-D3/def2-TZVP+COSMO) = -1287.054479377 (conv)

Lowest Freq. = -1060.34 cm<sup>-1</sup>

48

2o-TS1(1,5) (TS009/c1c/pbe0-d3.def2-TZVP)

|   |            |            |            |
|---|------------|------------|------------|
| C | -0.4700040 | -0.5989635 | -0.0325199 |
| C | -2.2366890 | -0.3038144 | -1.8000311 |
| C | -0.7505249 | -0.2463768 | -1.4894664 |
| H | -0.6351903 | -1.6654005 | 0.1401828  |
| C | 0.9003121  | -0.2517552 | 0.5012053  |
| H | -0.2166107 | -0.9256028 | -2.1603807 |
| H | -0.3758907 | 0.7599361  | -1.6979748 |
| H | -2.6251374 | -1.3000442 | -1.5525152 |
| H | 0.7932725  | -0.3598974 | 1.7291709  |
| O | 1.2333255  | 1.1342535  | 0.3398478  |
| C | 2.1391125  | -1.0606826 | 0.1110789  |
| C | 1.8278543  | -2.5482452 | 0.2416030  |
| C | 3.2862280  | -0.7070618 | 1.0596100  |
| C | 2.5820994  | -0.7463900 | -1.3206599 |
| H | 1.4484754  | -2.7921266 | 1.2381330  |
| H | 2.7400317  | -3.1273683 | 0.0825458  |
| H | 1.0933955  | -2.8784545 | -0.4953370 |
| H | 1.8444002  | -1.0648203 | -2.0565784 |
| H | 3.5153988  | -1.2742177 | -1.5323298 |
| H | 2.7599881  | 0.3218310  | -1.4505224 |
| H | 3.0446334  | -0.9666418 | 2.0926520  |
| H | 3.5182062  | 0.3580673  | 1.0215157  |
| H | 4.1836945  | -1.2598363 | 0.7734821  |
| S | 0.5390389  | 2.2552125  | 1.2228073  |
| O | -0.8669439 | 2.2629360  | 0.9708552  |
| O | 1.3077824  | 3.4332845  | 1.0077763  |
| C | 0.8258969  | 1.6373633  | 2.8461075  |
| C | 1.0839409  | 2.5106682  | 3.8964716  |
| C | 1.2507442  | 1.9801939  | 5.1661536  |
| H | 1.1574184  | 3.5757932  | 3.7122256  |
| C | 1.1739463  | 0.6087198  | 5.3775822  |
| H | 1.4508019  | 2.6429453  | 5.9993267  |
| C | 0.9342429  | -0.2612785 | 4.3168956  |
| H | 1.3118977  | 0.2100199  | 6.3766607  |
| C | 0.7537317  | 0.2839349  | 3.0671837  |
| H | 0.8948601  | -1.3323276 | 4.4807849  |
| H | -1.2014803 | -0.0745186 | 0.5870026  |
| H | -2.7626667 | 0.4008648  | -1.1456069 |
| C | -2.5573746 | 0.0153183  | -3.2496602 |
| H | -2.1664652 | 1.0103457  | -3.4953844 |
| H | -2.0274801 | -0.6876379 | -3.9049657 |
| C | -4.0438080 | -0.0313781 | -3.5624666 |
| H | -4.4328699 | -1.0255534 | -3.3134952 |
| H | -4.5702128 | 0.6717388  | -2.9071193 |
| C | -4.3557517 | 0.2906948  | -5.0133889 |
| H | -3.8653282 | -0.4169035 | -5.6878531 |
| H | -4.0054310 | 1.2923441  | -5.2774127 |
| H | -5.4288707 | 0.2508318  | -5.2131921 |

## 2o-INT1

E(PBE0-D3/def2-TZVP) = -1287.096925690 (conv)

Lowest Freq. = 11.12 cm<sup>-1</sup>

48

2o-INT1 (012/c1/pbe0-d3.def2-TZVP)

|   |            |            |            |
|---|------------|------------|------------|
| C | -1.8606216 | -0.1792937 | 0.3981845  |
| C | -2.5837608 | 0.0890771  | 1.7083204  |
| C | -0.6689398 | -1.0472083 | 0.5356613  |
| H | -1.5681510 | 0.7872280  | -0.0467975 |
| H | -2.5590811 | -0.6200597 | -0.3273980 |
| C | -0.0465764 | -1.7440434 | -0.6171476 |
| H | -0.1922823 | -1.1362706 | 1.5079072  |
| H | -2.9446857 | -0.8574707 | 2.1274111  |
| H | -0.1429386 | -2.8313356 | -0.4972734 |
| C | 1.4339635  | -1.4349708 | -0.7853450 |
| H | 1.9422241  | -1.5145397 | 0.1790516  |
| O | 1.5192216  | -0.0472359 | -1.2091598 |
| C | 2.1973328  | -2.2975385 | -1.8039313 |
| C | 2.2157517  | -3.7409702 | -1.3032789 |
| C | 3.6387158  | -1.7994153 | -1.8937478 |
| C | 1.5503591  | -2.2299547 | -3.1834864 |
| H | 2.6199606  | -3.8044590 | -0.2889608 |
| H | 2.8536147  | -4.3458431 | -1.9517480 |
| H | 1.2232780  | -4.1955702 | -1.3056582 |
| H | 0.5466765  | -2.6610986 | -3.1847679 |
| H | 2.1506612  | -2.7908485 | -3.9038145 |
| H | 1.4842390  | -1.1977446 | -3.5330521 |
| H | 4.1176653  | -1.7919554 | -0.9114323 |
| H | 3.6922731  | -0.7891447 | -2.3019307 |
| H | 4.2160737  | -2.4562930 | -2.5486026 |
| S | 2.3322199  | 1.0406666  | -0.4057954 |
| O | 3.0355538  | 1.7986607  | -1.3871761 |
| O | 3.0253685  | 0.4178550  | 0.6797591  |
| C | 1.0540302  | 2.0565262  | 0.2501401  |
| C | 0.3680627  | 2.9110368  | -0.6027596 |
| C | -0.6350764 | 3.7133195  | -0.0867386 |
| H | 0.6306359  | 2.9479937  | -1.6525927 |
| C | -0.9358176 | 3.6669477  | 1.2686481  |
| H | -1.1789850 | 4.3828513  | -0.7421378 |
| C | -0.2344318 | 2.8186259  | 2.1119620  |
| H | -1.7178105 | 4.3010505  | 1.6698238  |
| C | 0.7654984  | 2.0030847  | 1.6042929  |
| H | -0.4645594 | 2.7914639  | 3.1703323  |
| H | 1.3303012  | 1.3367168  | 2.2432348  |
| H | -0.5699651 | -1.4856875 | -1.5417139 |
| H | -1.8659099 | 0.4894403  | 2.4331859  |
| C | -3.7419415 | 1.0603569  | 1.5644654  |
| H | -4.4766351 | 0.6475392  | 0.8636631  |
| H | -3.3736190 | 1.9853134  | 1.1064908  |
| C | -4.4160650 | 1.3777162  | 2.8872706  |
| H | -5.2479676 | 2.0740841  | 2.7602672  |
| H | -3.7083013 | 1.8290392  | 3.5887744  |
| H | -4.8095586 | 0.4723578  | 3.3576002  |

## 2o-TS2a

E(PBE0-D3/def2-TZVP) = -1287.082526187 (conv)

Lowest Freq. = -368.58 cm<sup>-1</sup>

48

2o-TS2a (TS007A/c1/pbe0-d3.def2-TZVP)

|   |            |            |            |
|---|------------|------------|------------|
| C | -1.6721638 | 0.4181099  | 0.7194970  |
| C | -2.5865876 | -0.7763451 | 0.9985248  |
| C | -0.2283561 | 0.0580325  | 0.7386864  |
| H | -1.8700945 | 1.1888825  | 1.4700610  |
| H | -1.9331340 | 0.8498962  | -0.2531356 |
| C | 0.3047330  | -0.6920164 | -0.4343474 |

|   |            |            |            |
|---|------------|------------|------------|
| H | 0.1717908  | -0.2414871 | 1.7053276  |
| H | -2.4249093 | -1.5556912 | 0.2447706  |
| H | -0.1786793 | -1.6775659 | -0.4695435 |
| C | 1.8028480  | -0.8995773 | -0.3907872 |
| H | 2.0840092  | -1.3362137 | 0.5731873  |
| O | 2.4439894  | 0.3964708  | -0.4750270 |
| C | 2.4120830  | -1.7615729 | -1.5034678 |
| C | 1.8275936  | -3.1691805 | -1.4069532 |
| C | 3.9212614  | -1.8403217 | -1.2797731 |
| C | 2.1306620  | -1.1748268 | -2.8834494 |
| H | 1.9468430  | -3.5824269 | -0.4013226 |
| H | 2.3494180  | -3.8316864 | -2.1011025 |
| H | 0.7669772  | -3.1953734 | -1.6649817 |
| H | 1.0620197  | -1.1600929 | -3.1097397 |
| H | 2.6195202  | -1.7799865 | -3.6504914 |
| H | 2.5155365  | -0.1565311 | -2.9631241 |
| H | 4.1501108  | -2.2535449 | -0.2935277 |
| H | 4.3857129  | -0.8565412 | -1.3491211 |
| H | 4.3772008  | -2.4888129 | -2.0314157 |
| S | 2.4207962  | 1.3475361  | 0.7832451  |
| O | 3.3588151  | 2.3732019  | 0.4742519  |
| O | 2.5657781  | 0.5724811  | 1.9779173  |
| C | 0.7876148  | 2.0342614  | 0.7384190  |
| C | 0.3652874  | 2.6295414  | -0.4773783 |
| C | -0.6190057 | 3.5905696  | -0.4622138 |
| H | 0.8089487  | 2.3047434  | -1.4101520 |
| C | -1.1393229 | 4.0602095  | 0.7439969  |
| H | -0.9687738 | 4.0084585  | -1.3992678 |
| C | -0.6410279 | 3.5645117  | 1.9486759  |
| H | -1.9012590 | 4.8296168  | 0.7450237  |
| C | 0.3328770  | 2.5922136  | 1.9597088  |
| H | -1.0080107 | 3.9599808  | 2.8888418  |
| H | 0.7449935  | 2.2210373  | 2.8899568  |
| H | 0.0219723  | -0.1799595 | -1.3605817 |
| H | -2.3165701 | -1.2227084 | 1.9628898  |
| C | -4.0573303 | -0.3931433 | 1.0123293  |
| H | -4.3190982 | 0.0601186  | 0.0494796  |
| H | -4.2169682 | 0.3857245  | 1.7663978  |
| C | -4.9724325 | -1.5725981 | 1.2903229  |
| H | -6.0227706 | -1.2732911 | 1.2957679  |
| H | -4.7500294 | -2.0227910 | 2.2616674  |
| H | -4.8528689 | -2.3513120 | 0.5319577  |

## 2o-TS2b

E(PBE0-D3/def2-TZVP) = -1287.079617640 (conv)

Lowest Freq. = -416.64 cm<sup>-1</sup>

48

2o-TS2b (TS007B/c1/pbe0-d3.def2-TZVP)

|   |            |            |            |
|---|------------|------------|------------|
| C | -0.7862781 | -0.5918123 | 1.2258266  |
| C | -2.0365337 | -0.3299486 | 2.0512160  |
| C | -0.7751895 | 0.1297604  | -0.0886541 |
| H | -0.6979735 | -1.6717405 | 1.0358208  |
| H | 0.1034178  | -0.3388203 | 1.8125837  |
| C | -0.1810108 | -0.5595860 | -1.2740355 |
| H | -1.6844647 | 0.6834408  | -0.3076791 |
| H | -2.1517268 | 0.7497878  | 2.1945761  |
| H | -0.7036072 | -1.5150509 | -1.4130437 |
| C | 1.3038602  | -0.8317830 | -1.1228222 |
| H | 1.5113201  | -1.2659660 | -0.1397081 |
| O | 1.9835203  | 0.4459708  | -1.1809233 |

|   |            |            |            |
|---|------------|------------|------------|
| C | 1.9520841  | -1.7288084 | -2.1841185 |
| C | 1.3438013  | -3.1254855 | -2.0774509 |
| C | 3.4478918  | -1.8226778 | -1.8882212 |
| C | 1.7413360  | -1.1731221 | -3.5890365 |
| H | 1.4304854  | -3.5207478 | -1.0613229 |
| H | 1.8739313  | -3.8085297 | -2.7448557 |
| H | 0.2901065  | -3.1422599 | -2.3628936 |
| H | 0.6849727  | -1.1609337 | -3.8673636 |
| H | 2.2655161  | -1.7960824 | -4.3175006 |
| H | 2.1329214  | -0.1575164 | -3.6721397 |
| H | 3.6247692  | -2.1954148 | -0.8754997 |
| H | 3.9334814  | -0.8509567 | -1.9785907 |
| H | 3.9246102  | -2.5112082 | -2.5896919 |
| S | 1.9623324  | 1.3860581  | 0.0845740  |
| O | 2.8602794  | 2.4413396  | -0.2416498 |
| O | 2.1659820  | 0.6063617  | 1.2678374  |
| C | 0.3051346  | 2.0123573  | 0.0933787  |
| C | -0.1250224 | 2.6856125  | -1.0850012 |
| C | -1.1753842 | 3.5671596  | -1.0172441 |
| H | 0.3557241  | 2.4632780  | -2.0292256 |
| C | -1.7498581 | 3.8990182  | 0.2128733  |
| H | -1.5409216 | 4.0325340  | -1.9253487 |
| C | -1.2113745 | 3.3783471  | 1.3885525  |
| H | -2.5725275 | 4.6018627  | 0.2559461  |
| C | -0.1643039 | 2.4861989  | 1.3481310  |
| H | -1.6056296 | 3.6927637  | 2.3481016  |
| H | 0.2782578  | 2.0965437  | 2.2558429  |
| H | -0.3448397 | 0.0263053  | -2.1810623 |
| H | -2.9201081 | -0.6556502 | 1.4885083  |
| C | -2.0112128 | -1.0213187 | 3.4031280  |
| H | -1.1263700 | -0.6888313 | 3.9577658  |
| H | -1.8859099 | -2.1004282 | 3.2561998  |
| C | -3.2607444 | -0.7584260 | 4.2248452  |
| H | -3.2188188 | -1.2613051 | 5.1933906  |
| H | -4.1556807 | -1.1116750 | 3.7050578  |
| H | -3.3902458 | 0.3113853  | 4.4109270  |

## 2o-INT2a

E(PBE0-D3/def2-TZVP) = -1287.113142432 (conv)

Lowest Freq. = 34.34 cm<sup>-1</sup>

48

2o-INT2a (013A/c1/pbe0-d3.def2-TZVP)

|   |            |            |            |
|---|------------|------------|------------|
| C | -1.7293783 | 0.3507040  | 0.7762013  |
| C | -2.4026031 | -0.9545915 | 1.1658282  |
| C | -0.2059075 | 0.2818185  | 0.7284476  |
| H | -2.0201651 | 1.1250784  | 1.4934171  |
| H | -2.1040025 | 0.6868994  | -0.1975726 |
| C | 0.2768059  | -0.6115824 | -0.4109593 |
| H | 0.1527236  | -0.1413108 | 1.6742448  |
| H | -2.1873608 | -1.7351795 | 0.4274898  |
| H | -0.1540638 | -1.6036058 | -0.2693495 |
| C | 1.7817600  | -0.7583182 | -0.4810929 |
| H | 2.1534884  | -1.1821220 | 0.4581822  |
| O | 2.3693051  | 0.5631559  | -0.6111930 |
| C | 2.3346772  | -1.6007336 | -1.6368653 |
| C | 1.7751018  | -3.0165929 | -1.5195247 |
| C | 3.8555454  | -1.6567137 | -1.5050818 |
| C | 1.9641929  | -1.0058636 | -2.9923983 |
| H | 1.9666706  | -3.4405048 | -0.5295389 |
| H | 2.2560976  | -3.6643526 | -2.2557752 |
| H | 0.6997052  | -3.0507791 | -1.7052857 |
| H | 0.8849778  | -1.0135592 | -3.1611867 |
| H | 2.4232305  | -1.5928480 | -3.7913180 |
| H | 2.3213706  | 0.0215254  | -3.0817891 |
| H | 4.1500529  | -2.0797678 | -0.5407737 |
| H | 4.2977319  | -0.6634880 | -1.5871079 |
| H | 4.2770393  | -2.2856616 | -2.2926334 |
| S | 2.2039961  | 1.5197714  | 0.6379279  |
| O | 2.8523315  | 2.7333328  | 0.2772588  |
| O | 2.5834146  | 0.8151174  | 1.8266500  |
| C | 0.3777039  | 1.7290634  | 0.6636999  |
| C | -0.0141606 | 2.4710711  | -0.5660234 |
| C | -0.5482722 | 3.7185951  | -0.5172892 |
| H | 0.1635278  | 1.9915415  | -1.5201363 |
| C | -0.7677305 | 4.3810182  | 0.7042078  |
| H | -0.8106631 | 4.2153987  | -1.4446981 |
| C | -0.4427910 | 3.7301539  | 1.9092044  |
| H | -1.1838147 | 5.3797946  | 0.7172180  |
| C | 0.0843150  | 2.4794891  | 1.9184901  |
| H | -0.6257273 | 4.2330948  | 2.8522481  |
| H | 0.3342476  | 1.9840963  | 2.8493084  |
| H | -0.1070548 | -0.2339557 | -1.3628620 |
| H | -1.9836057 | -1.3099164 | 2.1156158  |
| C | -3.9103538 | -0.8172228 | 1.3031953  |
| H | -4.3252343 | -0.4521483 | 0.3568149  |
| H | -4.1336907 | -0.0453074 | 2.0481871  |
| C | -4.5901233 | -2.1177855 | 1.6927884  |
| H | -5.6710675 | -1.9937479 | 1.7865666  |
| H | -4.2135297 | -2.4867602 | 2.6507592  |
| H | -4.4087128 | -2.8963009 | 0.9465034  |

## 2o-INT2B

E(PBE0-D3/def2-TZVP) = -1287.106251729 (conv)

Lowest Freq. = 35.40 cm<sup>-1</sup>

48

2o-INT2B (013B/c1/pbe0-d3.def2-TZVP)

|   |            |            |            |
|---|------------|------------|------------|
| C | -0.9543751 | -0.5659383 | 1.1266587  |
| C | -2.3147200 | -0.3237694 | 1.7620968  |
| C | -0.7084784 | 0.2821401  | -0.1295464 |
| H | -0.8895012 | -1.6235970 | 0.8473082  |
| H | -0.1610849 | -0.4120762 | 1.8606678  |
| C | -0.0442348 | -0.5246377 | -1.2476065 |
| H | -1.6879199 | 0.5950661  | -0.5071134 |
| H | -2.4446948 | 0.7448347  | 1.9661336  |
| H | -0.6176125 | -1.4444925 | -1.3770396 |
| C | 1.4007307  | -0.8636836 | -0.9539700 |
| H | 1.4861966  | -1.3492859 | 0.0242565  |
| O | 2.1249636  | 0.3935008  | -0.8742971 |
| C | 2.1320080  | -1.7372214 | -1.9787586 |
| C | 1.4421103  | -3.0982910 | -2.0344662 |
| C | 3.5708376  | -1.9316697 | -1.5041321 |
| C | 2.1333648  | -1.0954870 | -3.3629255 |
| H | 1.3725128  | -3.5501871 | -1.0408161 |
| H | 2.0179201  | -3.7770012 | -2.6674780 |
| H | 0.4358304  | -3.0340913 | -2.4532847 |
| H | 1.1249355  | -1.0114428 | -3.7743484 |
| H | 2.7186808  | -1.7066196 | -4.0538788 |
| H | 2.5796833  | -0.0997635 | -3.3338860 |
| H | 3.5977379  | -2.3805765 | -0.5074388 |
| H | 4.1063129  | -0.9829861 | -1.4607000 |
| H | 4.1042031  | -2.5955675 | -2.1883948 |
| S | 1.8143692  | 1.2978610  | 0.3852427  |
| O | 2.5833874  | 2.4803320  | 0.2008933  |
| O | 1.9685262  | 0.5162201  | 1.5764381  |
| C | 0.0259338  | 1.6495082  | 0.1333431  |
| C | -0.0811810 | 2.5366071  | -1.0625391 |
| C | -0.5965835 | 3.7901580  | -0.9954522 |
| H | 0.2769889  | 2.1478834  | -2.0069085 |
| C | -1.0374534 | 4.3438093  | 0.2203399  |
| H | -0.6635844 | 4.3793054  | -1.9032661 |
| C | -0.9281712 | 3.5818586  | 1.3974443  |
| H | -1.4382894 | 5.3482963  | 0.2522956  |
| C | -0.4305619 | 2.3184368  | 1.3859986  |
| H | -1.2461237 | 4.0114957  | 2.3409610  |
| H | -0.3253351 | 1.7620995  | 2.3077676  |
| H | -0.0950638 | 0.0168442  | -2.1942221 |
| H | -3.1002059 | -0.5872618 | 1.0423932  |
| C | -2.5185598 | -1.1112394 | 3.0447353  |
| H | -1.7382239 | -0.8339416 | 3.7625825  |
| H | -2.3731879 | -2.1785100 | 2.8407545  |
| C | -3.8870651 | -0.8896194 | 3.6643795  |
| H | -4.0084627 | -1.4618207 | 4.5865935  |
| H | -4.6835693 | -1.1911782 | 2.9784693  |
| H | -4.0429903 | 0.1656988  | 3.9047157  |

## 2o-TS3a

E(PBE0-D3/def2-TZVP) = -1287.103378560 (conv)

Lowest Freq. = -280.60 cm<sup>-1</sup>

48

2o-TS3a (TS008A/c1/pbe0-d3.def2-TZVP)

|   |            |            |            |
|---|------------|------------|------------|
| C | -1.8636904 | 0.2067701  | 0.8048965  |
| C | -2.3319195 | -1.1784292 | 1.2183896  |
| C | -0.3421810 | 0.3589938  | 0.6797913  |
| H | -2.2224782 | 0.9328562  | 1.5418310  |
| H | -2.3286574 | 0.4922420  | -0.1466143 |
| C | 0.1925691  | -0.4520673 | -0.5004056 |
| H | 0.1098491  | -0.0359695 | 1.5980155  |
| H | -2.0470363 | -1.9242392 | 0.4682038  |
| H | -0.2402720 | -1.4508382 | -0.4359718 |
| C | 1.6989661  | -0.6155695 | -0.5412862 |
| H | 2.0445776  | -1.0307924 | 0.4123106  |
| O | 2.3254263  | 0.6801421  | -0.6972879 |
| C | 2.2505215  | -1.5030388 | -1.6669376 |
| C | 1.6866936  | -2.9133122 | -1.5078303 |
| C | 3.7706837  | -1.5644663 | -1.5263136 |
| C | 1.8890398  | -0.9504128 | -3.0425810 |
| H | 1.8684982  | -3.3044408 | -0.5026126 |
| H | 2.1739087  | -3.5856098 | -2.2176157 |
| H | 0.6133330  | -2.9547708 | -1.7033278 |
| H | 0.8106238  | -0.9637064 | -3.2166737 |
| H | 2.3531312  | -1.5607277 | -3.8209248 |
| H | 4.0579632  | -1.9494016 | -0.5439836 |
| H | 4.2209211  | -0.5790159 | -1.6467894 |
| H | 4.1900409  | -2.2287368 | -2.2855692 |
| S | 2.2287183  | 1.6483647  | 0.5747990  |
| O | 2.8890589  | 2.8537452  | 0.1730407  |
| O | 2.6675530  | 0.9311742  | 1.7470205  |
| C | -0.0209236 | 1.8517913  | 0.6394031  |
| C | -0.2586222 | 2.6010313  | -0.5534472 |
| C | -0.3885878 | 3.9683287  | -0.5151909 |
| H | -0.2783770 | 2.0870085  | -1.5059401 |
| C | -0.3701988 | 4.6529336  | 0.6991629  |
| H | -0.5163689 | 4.5182531  | -1.4402860 |
| C | -0.2588680 | 3.9355974  | 1.8928985  |
| H | -0.4621841 | 5.7316326  | 0.7181228  |
| C | -0.1327274 | 2.5705141  | 1.8747302  |
| H | -0.2837368 | 4.4594648  | 2.8412856  |
| H | -0.0440427 | 2.0130235  | 2.8006129  |
| H | -0.1611937 | -0.0234024 | -1.4418122 |
| H | -1.8232223 | -1.4703794 | 2.1456557  |
| C | -3.8363219 | -1.2499695 | 1.4268828  |
| H | -4.3419628 | -0.9447214 | 0.5036835  |
| H | -4.1288377 | -0.5175226 | 2.1875566  |
| C | -4.3108942 | -2.6326686 | 1.8374540  |
| H | -5.3926527 | -2.6585035 | 1.9847266  |
| H | -3.8404303 | -2.9485391 | 2.7726381  |
| H | -4.0613669 | -3.3770136 | 1.0761802  |
| H | 2.2456776  | 0.0743979  | -3.1598926 |

## 2o-TS3b

E(PBE0-D3/def2-TZVP) = -1287.097572518 (conv)

Lowest Freq. = -316.92 cm<sup>-1</sup>

48

2o-TS3b (TS008B/c1/pbe0-d3.def2-TZVP)

|   |            |            |            |
|---|------------|------------|------------|
| C | -0.9813968 | -0.5809595 | 1.0766488  |
| C | -2.3527009 | -0.4939592 | 1.7301598  |
| C | -0.8654305 | 0.2393077  | -0.2131003 |
| H | -0.7847379 | -1.6321690 | 0.8390189  |
| H | -0.2001315 | -0.2947331 | 1.7858068  |
| C | -0.0626329 | -0.5023332 | -1.2902301 |
| H | -1.8812973 | 0.3249300  | -0.6213381 |
| H | -2.6405071 | 0.5542527  | 1.8685514  |
| H | -0.5674976 | -1.4562495 | -1.4560240 |
| C | 1.3881880  | -0.7697211 | -0.9443551 |
| H | 1.4673668  | -1.1922921 | 0.0631632  |
| O | 2.0927527  | 0.4961011  | -0.9413438 |
| C | 2.1528388  | -1.7001093 | -1.8962910 |
| C | 1.5137268  | -3.0862730 | -1.8488624 |
| C | 3.5946172  | -1.8098799 | -1.4029164 |
| C | 2.1411915  | -1.1681975 | -3.3262073 |
| H | 1.4484573  | -3.4593344 | -0.8226478 |
| H | 2.1228763  | -3.7912443 | -2.4189775 |
| H | 0.5116168  | -3.0969948 | -2.2820425 |
| H | 1.1326993  | -1.1517458 | -3.7459761 |
| H | 2.7518846  | -1.8094814 | -3.9661503 |
| H | 2.5511431  | -0.1575820 | -3.3719497 |
| H | 3.6296054  | -2.1733448 | -0.3721786 |
| H | 4.1008226  | -0.8450676 | -1.4363621 |
| H | 4.1511239  | -2.5117786 | -2.0283975 |
| S | 1.7655978  | 1.4493480  | 0.3021006  |
| O | 2.4697573  | 2.6653677  | 0.0297409  |
| O | 2.0173503  | 0.7297936  | 1.5266897  |
| C | -0.4478140 | 1.7050963  | -0.0004196 |
| C | -0.4577983 | 2.5582844  | -1.1538385 |
| C | -0.5317607 | 3.9221278  | -1.0353647 |
| H | -0.3566204 | 2.1127039  | -2.1352379 |
| C | -0.6792340 | 4.5221040  | 0.2160437  |
| H | -0.4882666 | 4.5380252  | -1.9260194 |
| C | -0.7927253 | 3.7171479  | 1.3502904  |
| H | -0.7266416 | 5.6002104  | 0.3035527  |
| C | -0.7288484 | 2.3498896  | 1.2520470  |
| H | -0.9438063 | 4.1732276  | 2.3217536  |
| H | -0.7990979 | 1.7462916  | 2.1463497  |
| H | -0.0995325 | 0.0369914  | -2.2389209 |
| H | -3.1003683 | -0.9171679 | 1.0475625  |
| C | -2.4220518 | -1.2155483 | 3.0649593  |
| H | -1.6835114 | -0.7791250 | 3.7470342  |
| H | -2.1209084 | -2.2604003 | 2.9261174  |
| C | -3.8011819 | -1.1591125 | 3.6977580  |
| H | -3.8248565 | -1.6794656 | 4.6575775  |
| H | -4.5509427 | -1.6217966 | 3.0499802  |
| H | -4.1113169 | -0.1251346 | 3.8722454  |
